# Supplementary material for: Conversion of CO2 into porous metal–organic framework monoliths
Source: Royal Society of Chemistry journal article supplement (doi:10.1039/d4ta08744e), 2025-01-01
Supplement: d4ta08744e1.pdf [file d4ta08744e1.pdf]

*Supporting Information for*

**Conversion of CO<sub>2</sub> into Porous Metal-Organic Frameworks  
Monoliths**

Kanchana Sotho,<sup>a</sup> Kentaro Kadota,<sup>\*b</sup> Takuya Kurihara,<sup>c</sup> Thanakorn  
Tiyawarakul,<sup>a</sup> Hiroki Yamada,<sup>d</sup> Kanokwan Kongpatpanich,<sup>a</sup> and Satoshi  
Horike<sup>\*a,b,c</sup>

<sup>a</sup> Department of Materials Science and Engineering, School of Molecular Science and Engineering, Vidyasirimedhi Institute of Science and Technology, Rayong 21210, Thailand

<sup>b</sup> Department of Chemistry, Graduate School of Science, Kyoto University, Kitashirakawa-Oiwakecho, Sakyo-ku, Kyoto 606-8502, Japan

<sup>c</sup> Division of Material Chemistry, Graduate School of Natural Science and Technology, Kanazawa University, Kanazawa, Ishikawa 920-1192, Japan

<sup>d</sup> Diffraction and Scattering Division, Japan Synchrotron Radiation Research Institute (JASRI), Sayo, Hyogo 679-5198, Japan

<sup>e</sup> Institute for Integrated Cell-Material Sciences, Institute for Advanced Study, Kyoto University, Yoshida-Honmachi, Sakyo-ku, Kyoto 606-8501, Japan

**Table of Contents**

Supplementary Figures and Tables: S2–S28

## Materials

All chemicals and solvents used in the synthesis were reagents for synthesis grade. Aluminum nitrate nonahydrate, Cerium(III) nitrate hexahydrate, deuterated dimethyl sulfoxide ( $\text{DMSO-}d_6$ ), deuterium chloride ( $\text{DCl}$ ), deuteriochloroform ( $\text{CDCl}_3$ ), styrene oxide (SO) and ethanol (EtOH) were purchased from Sigma-Aldrich. Gallium(III) nitrate hydrate was purchased from Thermo Scientific. Anhydrous acetonitrile (MeCN) and anhydrous methanol (MeOH) were purchased from Alfa Aesar and Fisher Chemicals respectively. Sodium borohydride was purchased from DAEJUNG chemicals. Epichlorohydrin (ECH) and tetrabutylammonium bromide (TBAB) were purchased from TCI chemicals. All chemicals and solvents were used without further purification.

## Characterizations

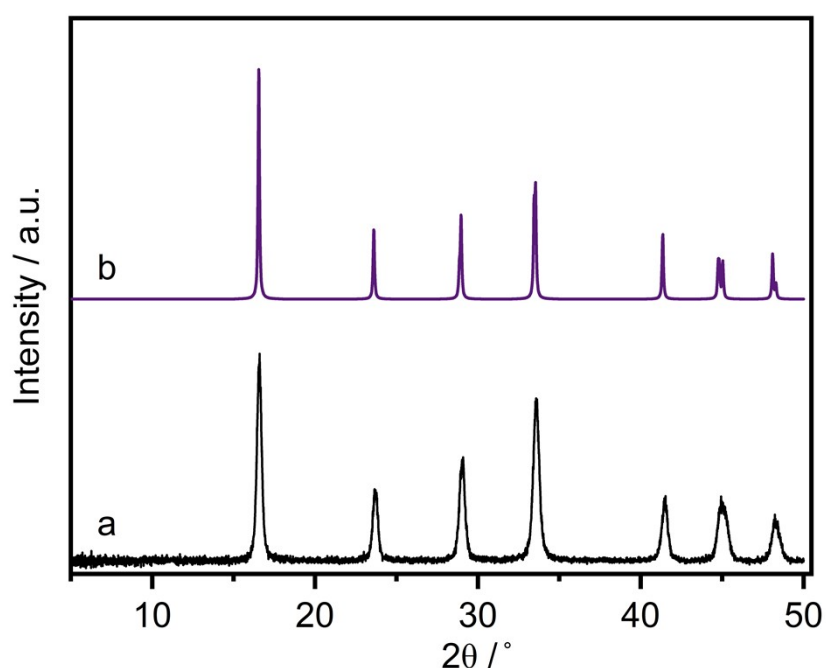

**Figure S1.** PXRD patterns of (a)  $\text{Ce-CO}_2$  and (b)  $\text{Ce(OHCO)}_{3.1}$ .<sup>1</sup>

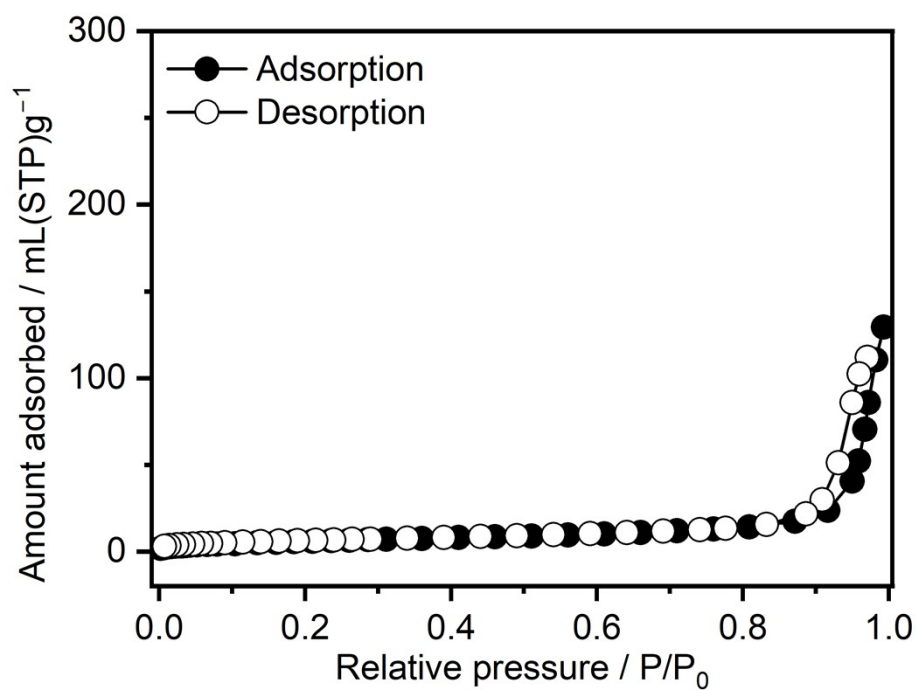

**Figure S2.** N<sub>2</sub> adsorption isotherm of Ce-CO<sub>2</sub> at 77 K.

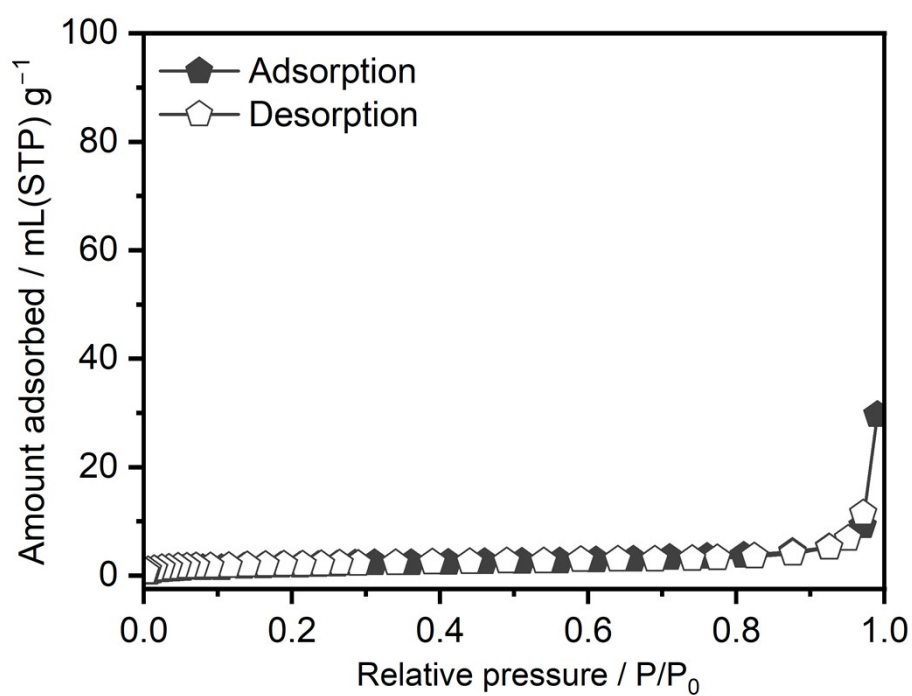

**Figure S3.** N<sub>2</sub> adsorption isotherm of Al-CO<sub>2</sub> synthesized in MeCN/EtOH at 77 K

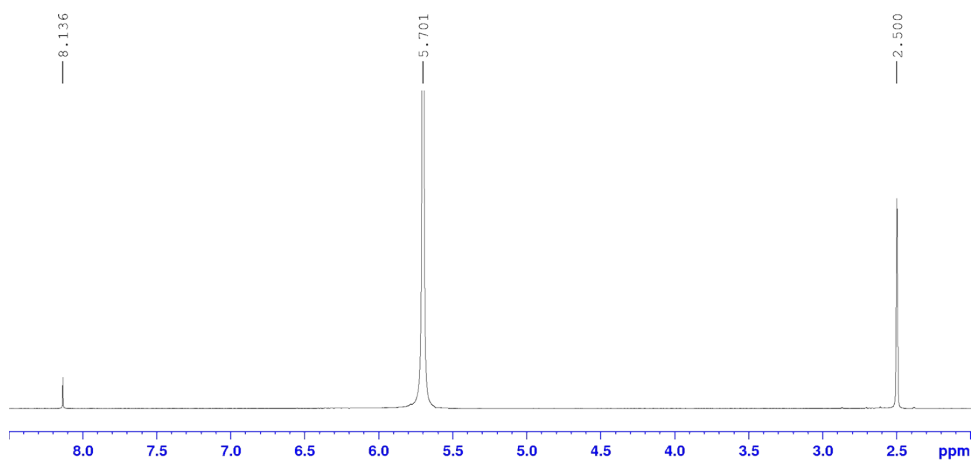

**Figure S4.** Acid digested  $^1\text{H}$  NMR spectrum of  $\text{Al-CO}_2$  synthesized in MeCN/EtOH.

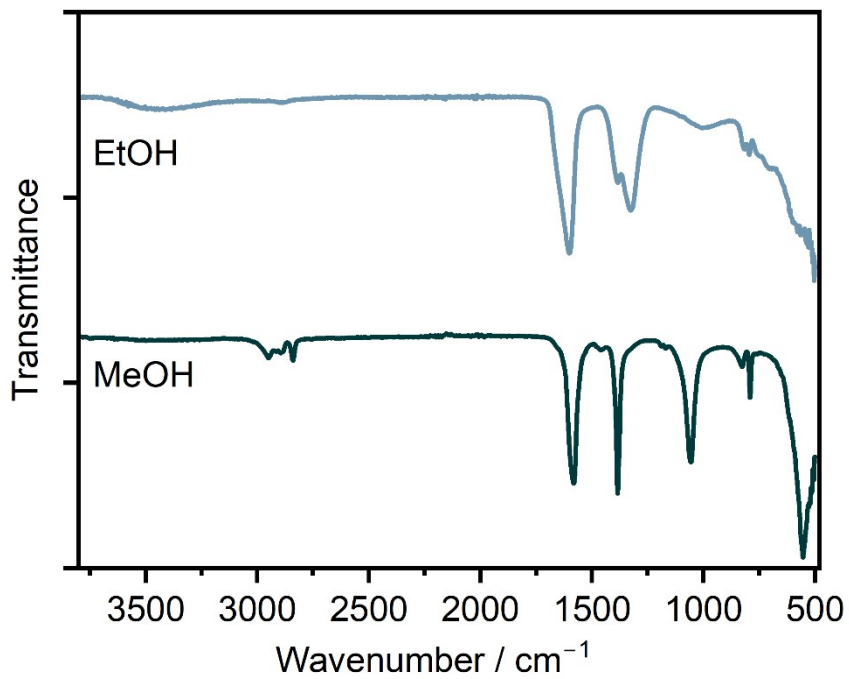

**Figure S5.** FT-IR spectra of  $\text{Al-CO}_2$  synthesized in MeCN/MeOH and MeCN/EtOH.

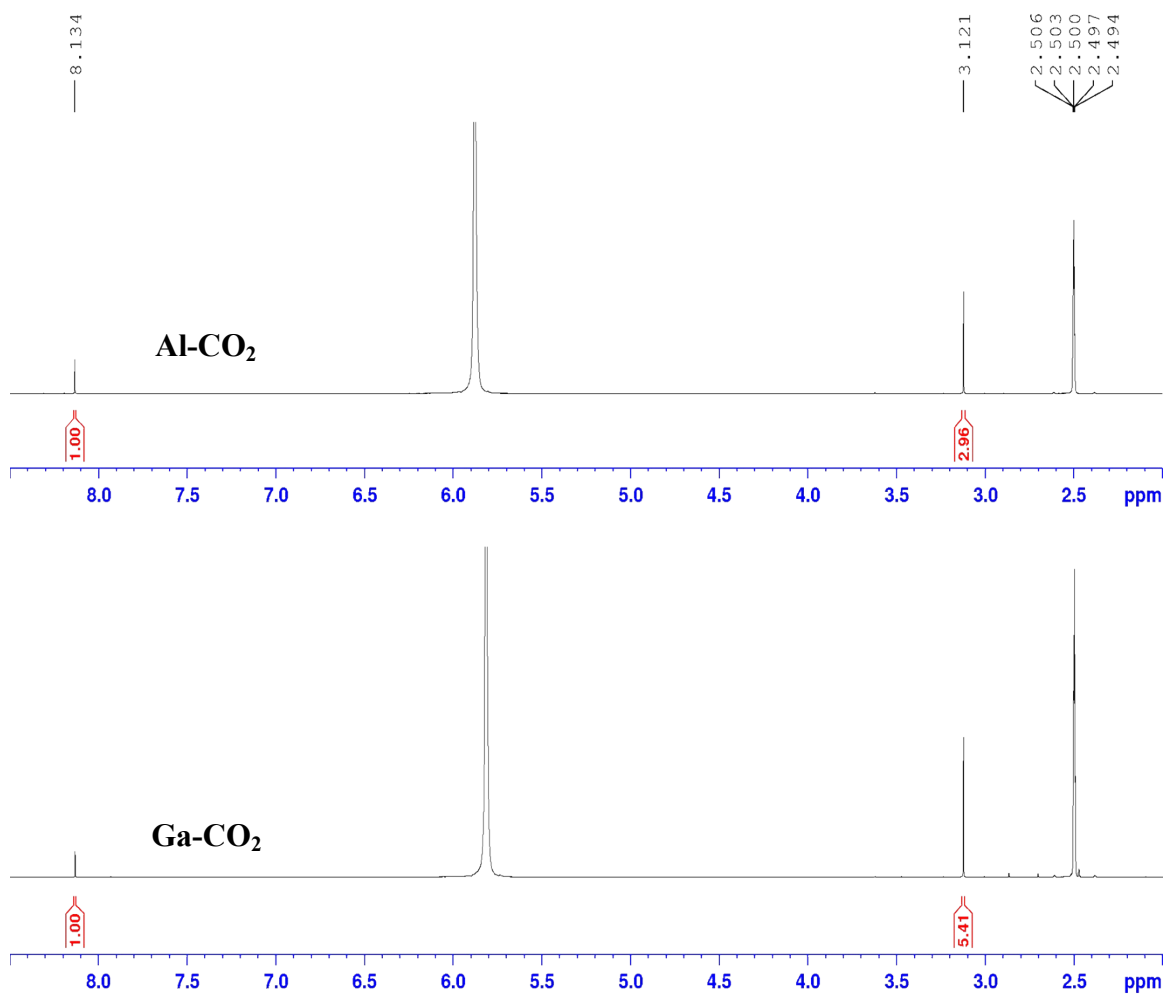

**Figure S6.** Acid-digested  $^1\text{H}$  NMR spectra of  $\text{Al-CO}_2$  and  $\text{Ga-CO}_2$ .

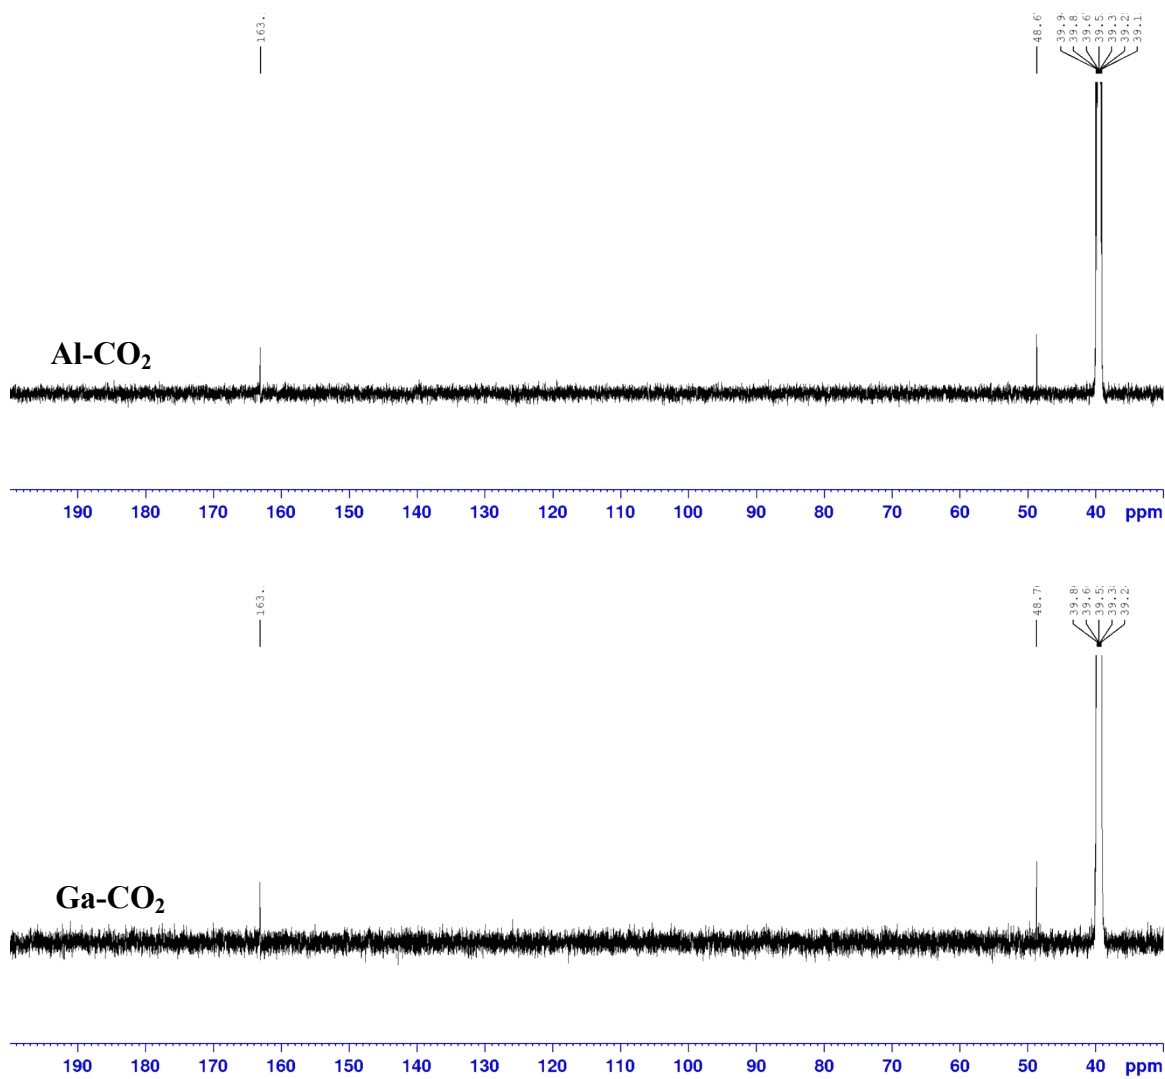

**Figure S7.** Acid-digested  $^{13}\text{C}$  NMR spectra of **Al-CO<sub>2</sub>** and **Ga-CO<sub>2</sub>**.

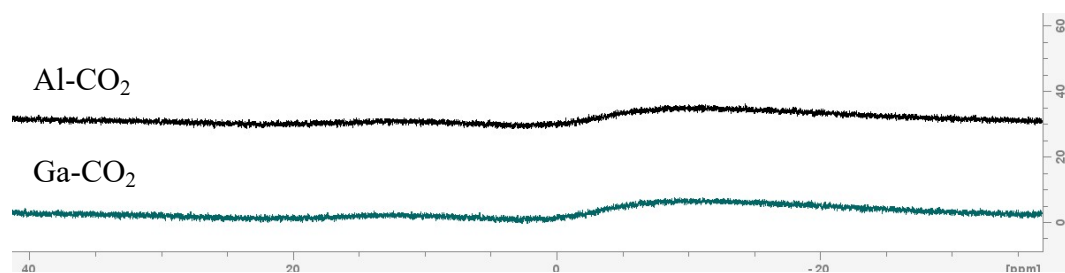

**Figure S8.** Acid-digested  $^{11}\text{B}$  NMR spectra of **Al-CO<sub>2</sub>** and **Ga-CO<sub>2</sub>**.

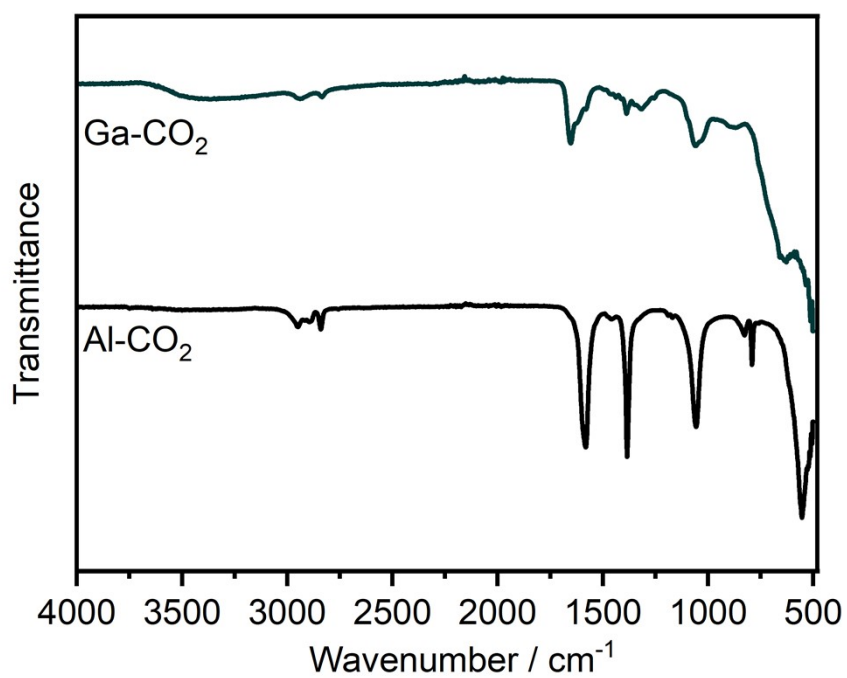

**Figure S9.** FT-IR spectra of Al-CO<sub>2</sub> and Ga-CO<sub>2</sub>.

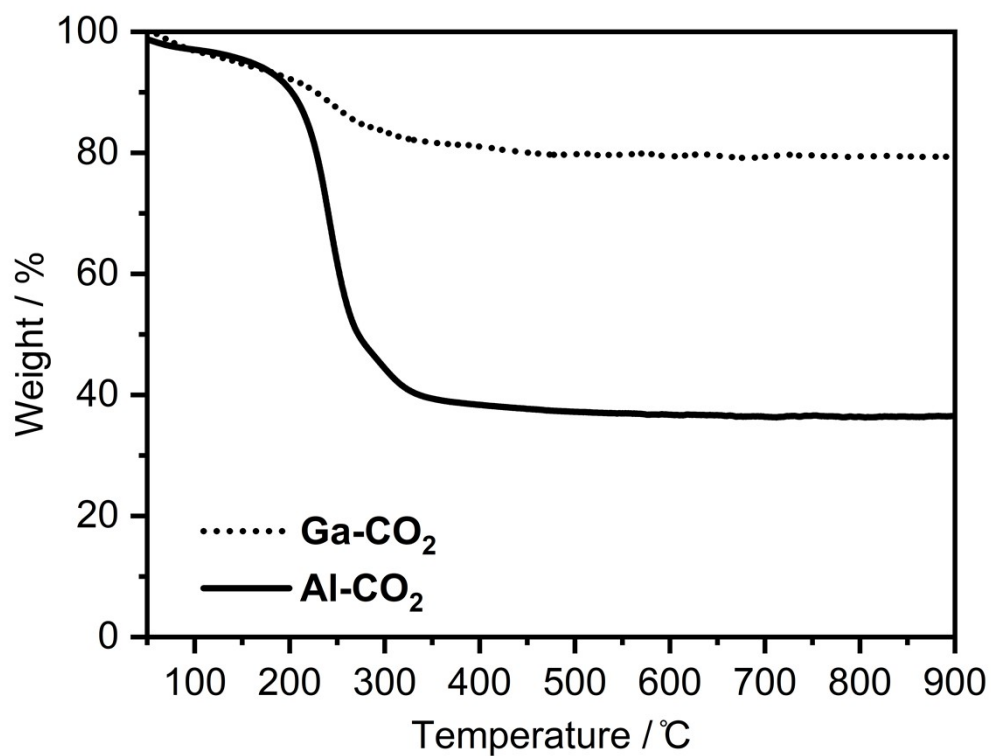

**Figure S10.** TGA curves of Al-CO<sub>2</sub> and Ga-CO<sub>2</sub> under air.

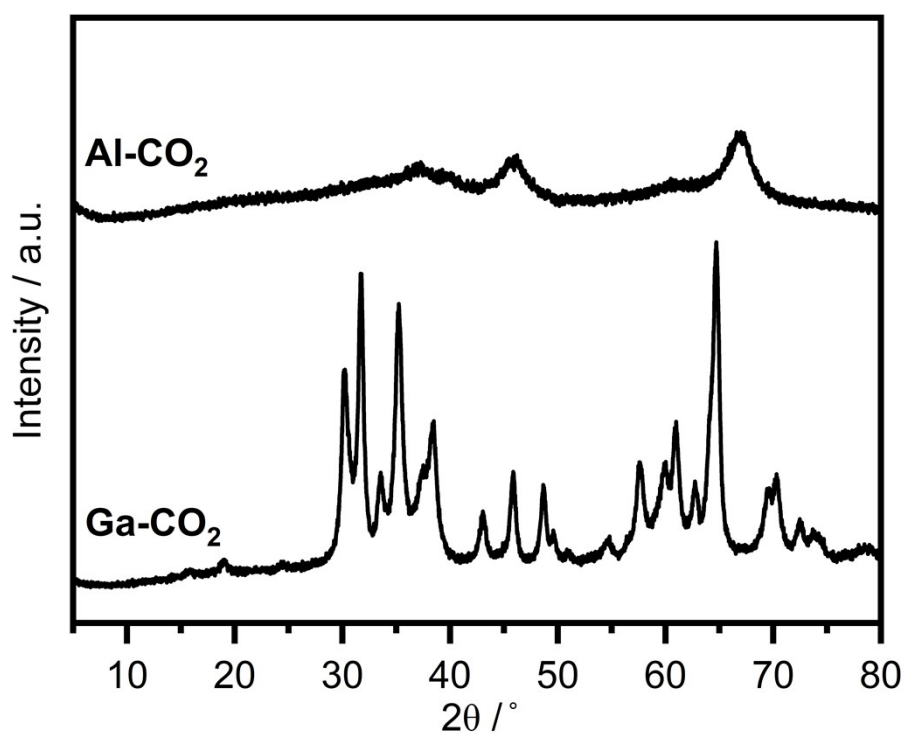

**Figure S11.** PXRD patterns of Al-CO<sub>2</sub> and Ga-CO<sub>2</sub> residues after pyrolysis. Residual metal mass was calculated by recalculating Al from Al<sub>2</sub>O<sub>3</sub> (52.9 wt%) and recalculating Ga from Ga<sub>2</sub>O<sub>3</sub> (74.4 wt%). The PXRD of Al-CO<sub>2</sub> and Ga-CO<sub>2</sub> residues match with Al<sub>2</sub>O<sub>3</sub><sup>2</sup> and Ga<sub>2</sub>O<sub>3</sub>.<sup>3</sup>

**Table S1.** Elemental analysis of Al-CO<sub>2</sub> and Ga-CO<sub>2</sub>.

| Sample                                                                           | Elemental analysis (%) <sup>[a]</sup> |           |           | Metal content (%) <sup>[b]</sup> |
|----------------------------------------------------------------------------------|---------------------------------------|-----------|-----------|----------------------------------|
|                                                                                  | C                                     | H         | N         |                                  |
| Experimental Al-CO <sub>2</sub>                                                  | 22.3 ± 1.2                            | 4.6 ± 0.2 | 0.1 ± 0.1 | 19.3                             |
| Al <sub>2</sub> (OCHO) <sub>3</sub> (OMe) <sub>3</sub>                           | 25.5*                                 | 4.3*      | 0*        | 19.1*                            |
| Experimental Ga-CO <sub>2</sub>                                                  | 5.8 ± 0.1                             | 1.9 ± 0.1 | 0.5 ± 0.0 | 59.1                             |
| Ga <sub>2</sub> O <sub>1.8</sub> (OHCO) <sub>0.5</sub> (OMe) <sub>0.9</sub> (OH) | 7.1*                                  | 1.8*      | 0*        | 59.2*                            |

<sup>[a]</sup> Results of CHN element analysis, <sup>[b]</sup> Calculated by TGA under air.

\* Calculated



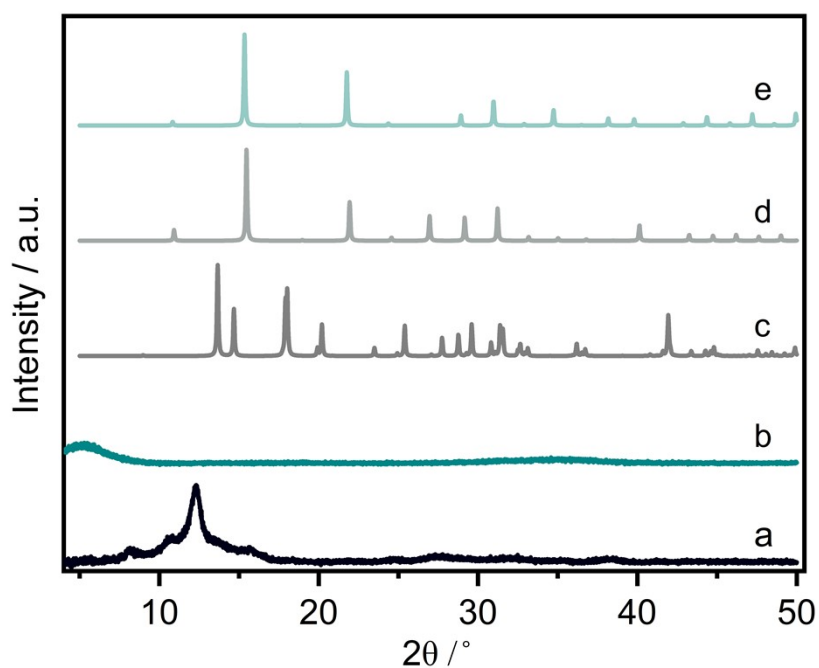

**Figure S12.** PXRD patterns of (a) Al-CO<sub>2</sub> and (b) Ga-CO<sub>2</sub> compared with simulated (c) Al(OH)(OCHO)<sub>2</sub>,<sup>4</sup> (d) Al(OCHO)<sub>3</sub>,<sup>5</sup> and (e) Ga(OCHO)<sub>3</sub>.<sup>5</sup>

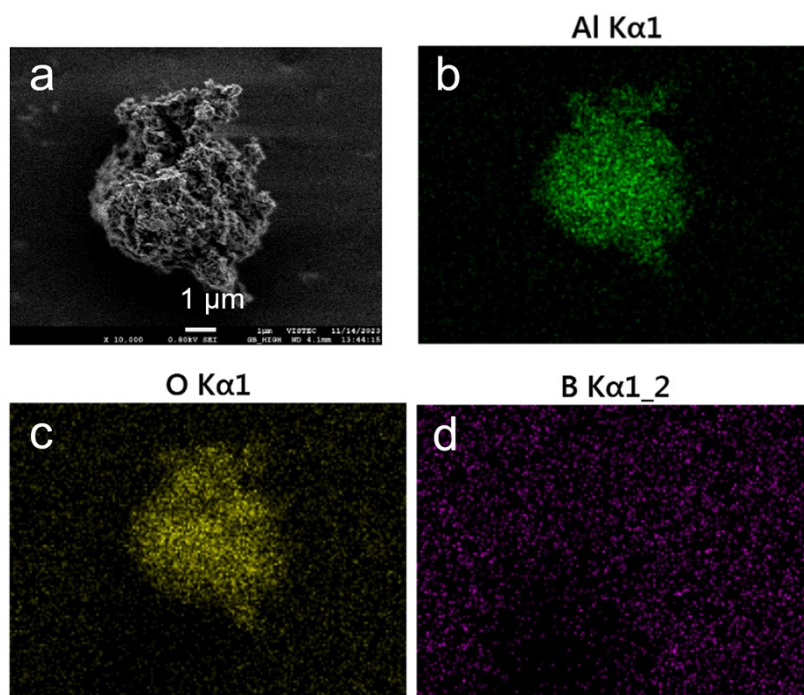

**Figure S13.** (a) SEM images and EDX mapping of Al-CO<sub>2</sub> for (b) Al, (c) O and (d) B.

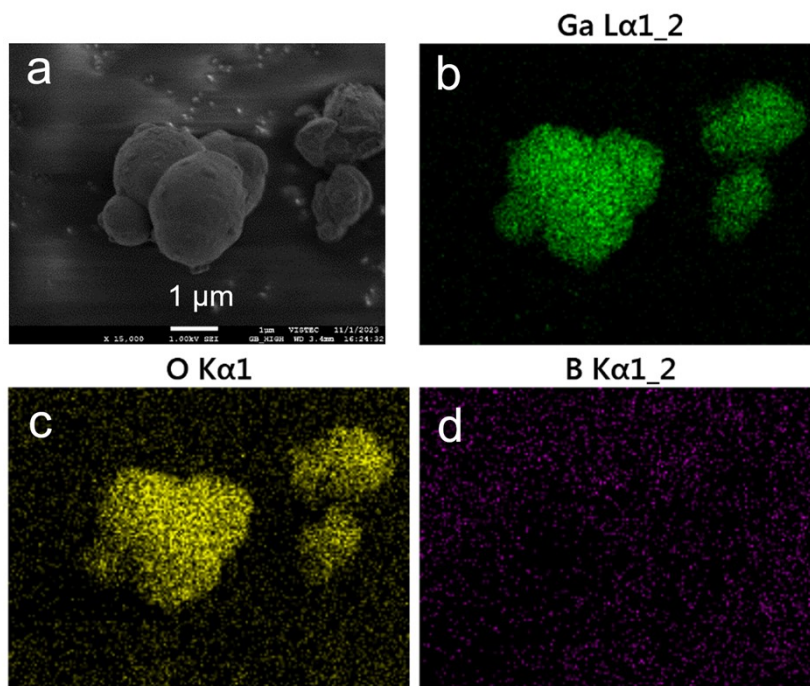

**Figure S14.** (a) SEM images and EDX mapping of Ga-CO<sub>2</sub> for (b) Ga, (c) O and (d) B.

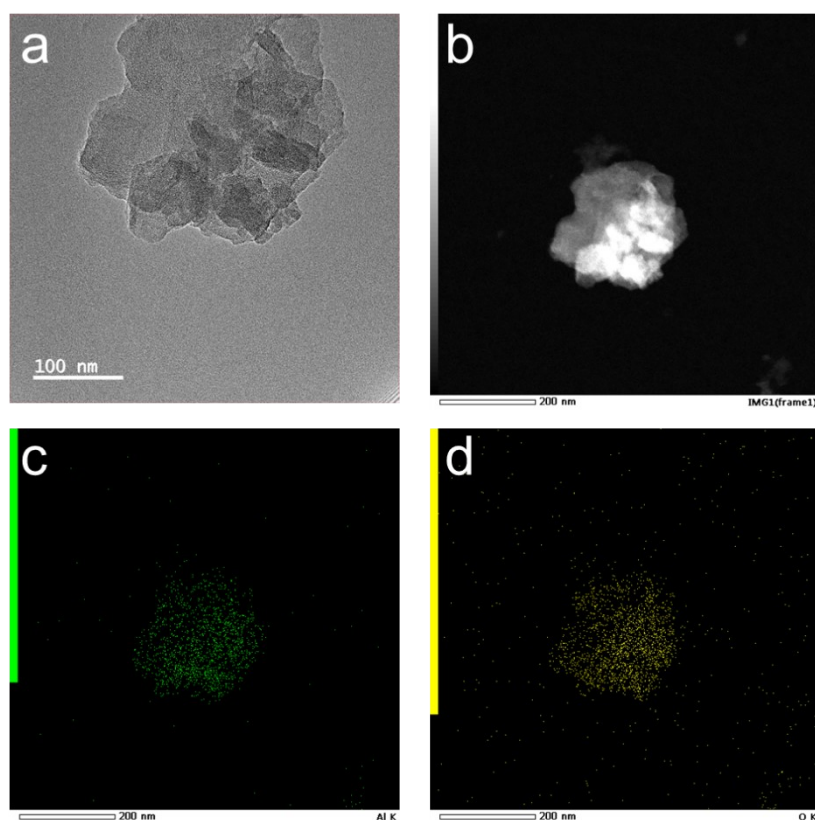

**Figure S15.** (a) TEM image and (b) TEM-EDS images of Al-CO<sub>2</sub> for (c) Al and (d) O.

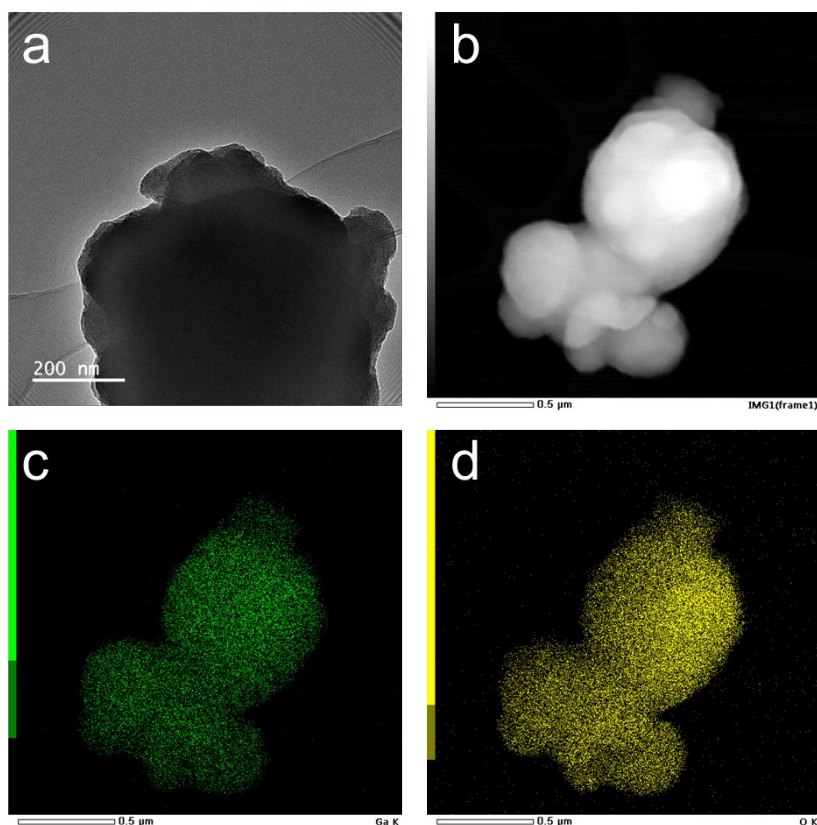

**Figure S16.** (a) TEM image and (b) TEM-EDS images of  $\text{Ga-CO}_2$  for (c) Ga and (d) O.

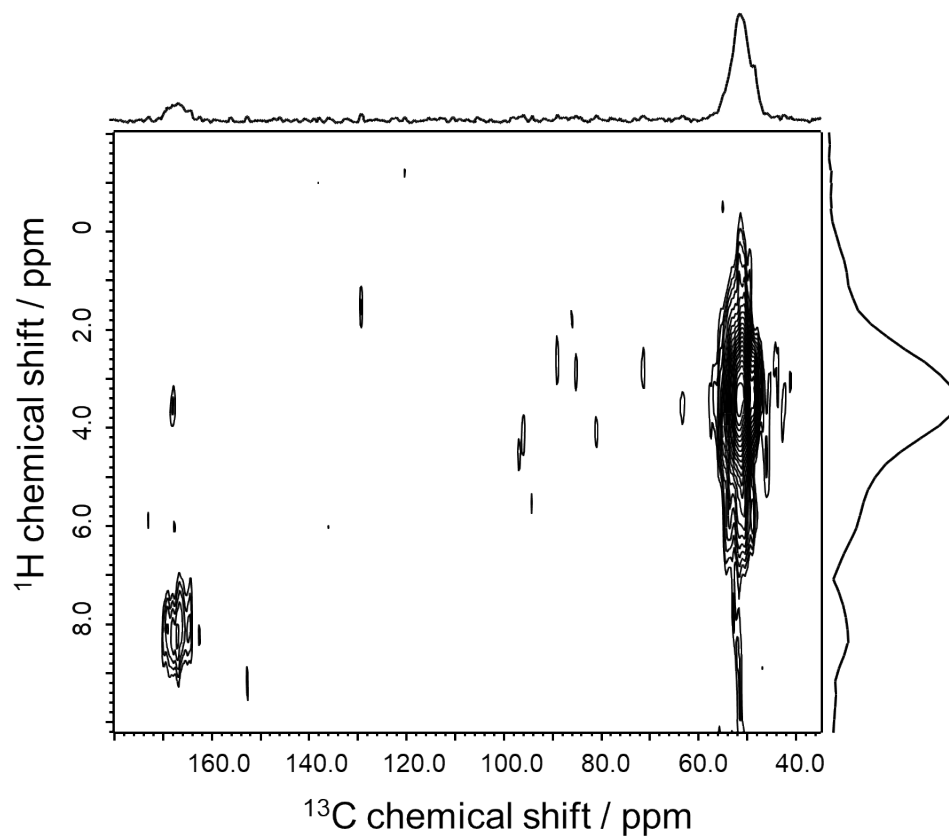

**Figure S17.**  $^1\text{H}$ - $^{13}\text{C}$  CP-HETCOR NMR spectra of  $\text{Ga-CO}_2$ .

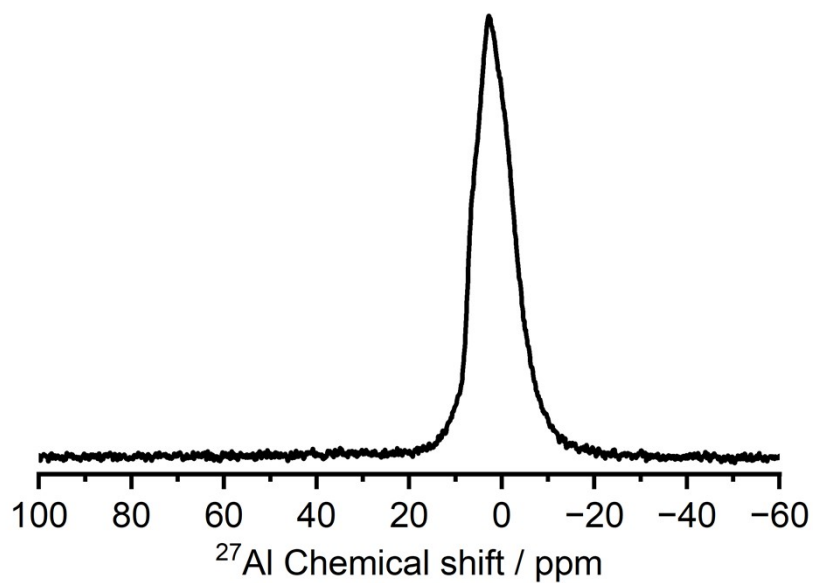

**Figure S18.**  $^{27}\text{Al}$  MAS NMR spectrum of  $\text{Al-CO}_2$ .

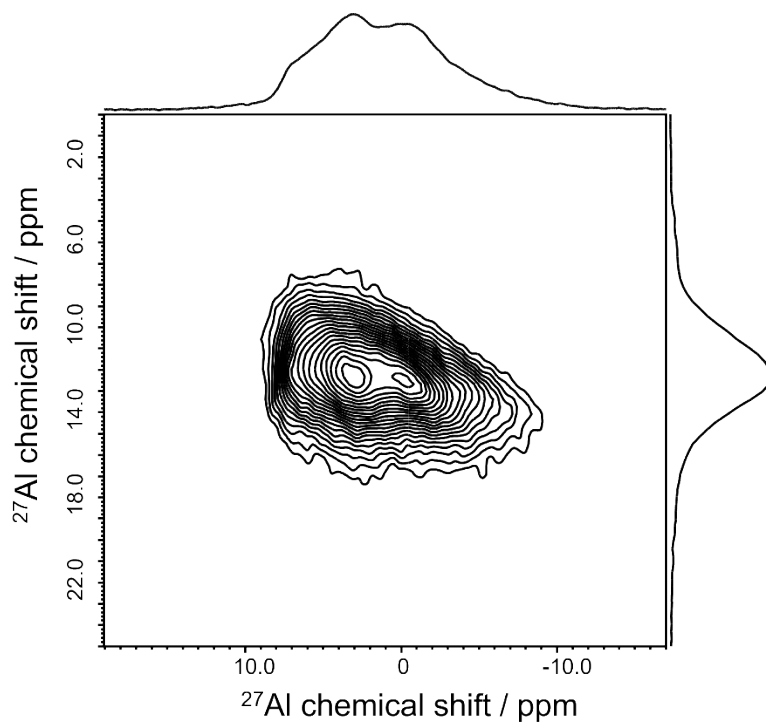

**Figure S19.**  $^{27}\text{Al}$  z-filter 3QMAS spectrum of  $\text{Al-CO}_2$  processed by a shearing transformation. The 1D spectrum sliced at 12.31 ppm in the isotropic dimension is displayed in Figure 2C in the main text.

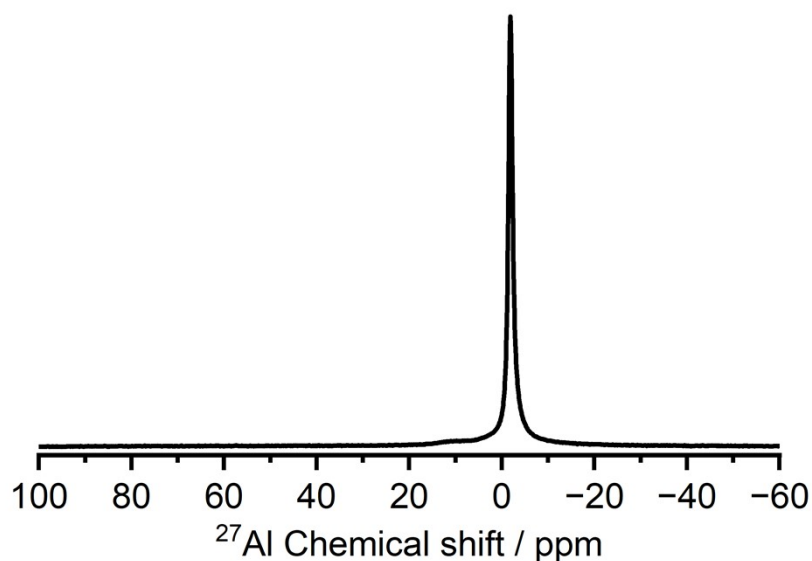

**Figure S20.**  $^{27}\text{Al}$  MAS NMR spectrum of  $[\text{Al}(\text{OCHO})_3]$ .

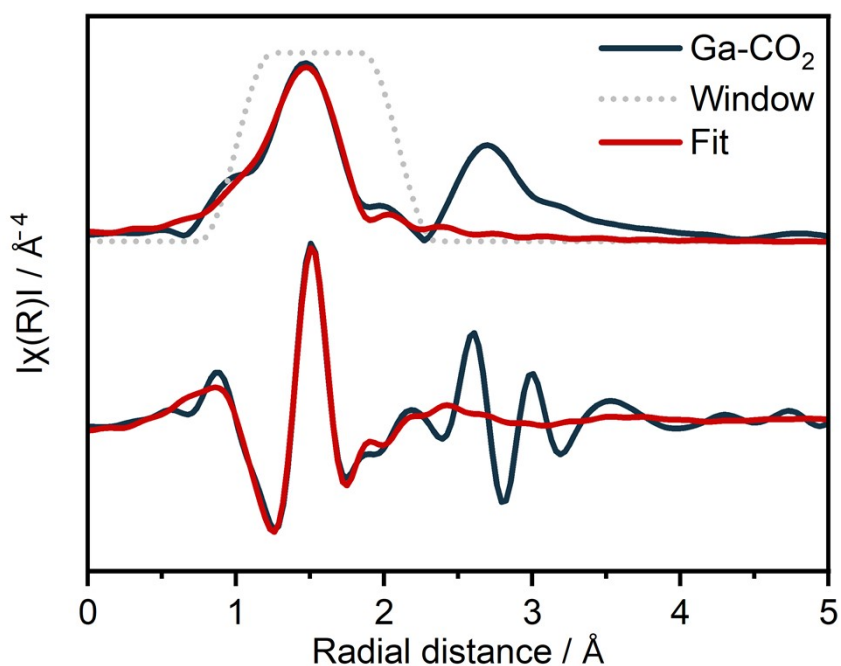

**Figure S21.** EXAFS spectrum (black) and fitting (red) of  $\text{Ga-CO}_2$ . The magnitude (top) and real component (bottom) of Fourier transformation.

**Table S2.** Results of the curve-fit parameters executed on the  $k^3$ -weighted FT-EXAFS spectra of  $\text{Ga-CO}_2$ .

| Path | N             | EXAFS ( $\text{\AA}$ ) | $\sigma^2$ ( $\text{\AA}^2$ ) | R-factor |
|------|---------------|------------------------|-------------------------------|----------|
| Ga-O | $5.6 \pm 0.6$ | 1.93                   | 0.010                         | 0.005    |

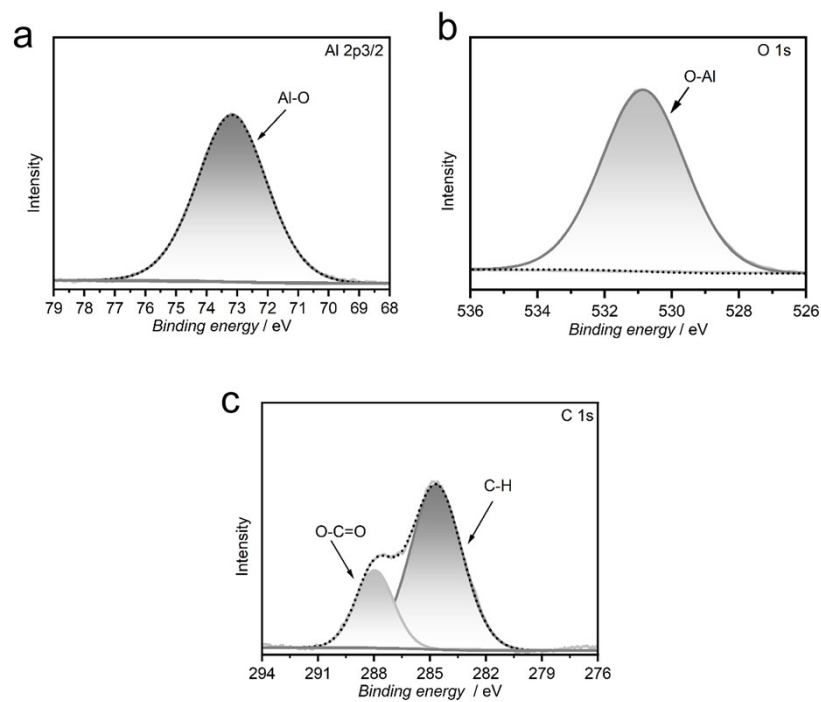

**Figure S22.** XPS spectra of Al-CO<sub>2</sub>, (a) Al 2p<sub>3/2</sub>, (b) O 1s and (c) C 1s.

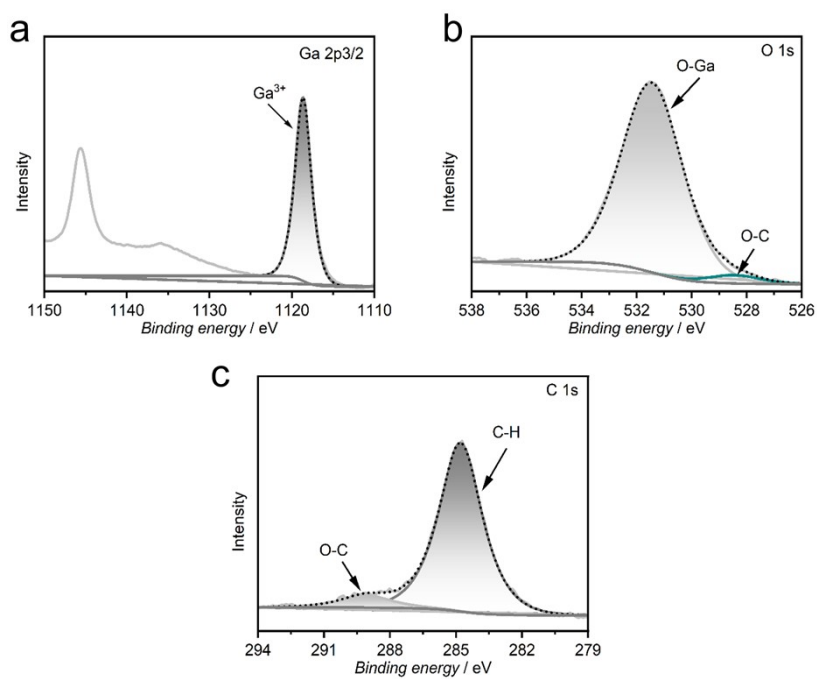

**Figure S23.** XPS spectra of Ga-CO<sub>2</sub> (a) Ga 2p<sub>3/2</sub>, (b) O 1s and (c) C 1s.

**Table S3.** M-M distances of the Al-based coordination materials reported in the Cambridge Crystallographic Data Centre (CCDC) database. Surveyed using ConQuest as of June 1<sup>st</sup>, 2024.

| CCDC code                                                | Al-Al distance / Å | CCDC code | Al-Al distance / Å | CCDC code | Al-Al distance / Å | CCDC code | Al-Al distance / Å |
|----------------------------------------------------------|--------------------|-----------|--------------------|-----------|--------------------|-----------|--------------------|
| Bridging type M-(R-COO) <sub>2</sub> (X) <sub>1</sub> -M |                    |           |                    |           |                    |           |                    |
| DIJNET                                                   | 3.312              | CAMTET    | 3.281              | DAZKEX    | 3.280              | EHALOP    | 3.315              |
| EFAQAH01                                                 | 3.316              | CAMTET01  | 3.285              | DAZKIB    | 3.277              | EHEJOT    | 3.267              |
| EFAQAH02                                                 | 3.315              | CAMTOD    | 3.31               | DAZMID    | 3.328              | EMAGUX    | 3.423              |
| HIJLEV                                                   | 3.376              | CAMTOD01  | 3.304              | DEKSAR    | 3.165              | EMAHAE    | 3.423              |
| HIJMIA                                                   | 3.364              | CAMTOD02  | 3.305              | DEKSEV    | 3.171              | FEDWEU    | 3.325              |
| MEZJOU                                                   | 3.157              | CAMTOD03  | 3.304              | DITGUL    | 3.288              | FEDWEU01  | 3.310              |
| MEZJUA                                                   | 3.162              | CAMTOD04  | 3.301              | DITHAS    | 3.211              | FIYSAK    | 3.286              |
| PIBZUY03                                                 | 3.397              | CAMTOD05  | 3.303              | DITHEW    | 3.276              | FOMMUS    | 3.130              |
| RIBSAA                                                   | 3.150              | CAMTOD06  | 3.299              | DITHEW01  | 3.267              | FOMNAZ    | 3.266              |
| UDUCOP                                                   | 3.315              | CAMVEV    | 3.309              | DITHOG    | 3.242              | GABWAL    | 3.294              |
| UDUCOP01                                                 | 3.311              | CAMVOF    | 3.309              | DITHUM    | 3.271              | GUKVAK    | 3.423              |
| UDUCOP02                                                 | 3.308              | CAMVUL    | 3.304              | DITJAU    | 3.333              | GUKVEO    | 3.312              |
| UDUCOP03                                                 | 3.313              | CAMVUL01  | 3.305              | DITJEY    | 3.279              | GUKVIS    | 3.208              |
| UDUCOP04                                                 | 3.296              | CAMWEW    | 3.323              | DITJEY01  | 3.291              | HAFQOW    | 3.301              |
| VICNEE                                                   | 3.368              | CAMWIA    | 3.325              | DITJEY02  | 3.353              | HAFQUC    | 3.322              |
| YIBHIE                                                   | 3.310              | CAMWOG    | 3.337              | DITJIC    | 3.282              | HAWMEZ    | 3.247              |
| YIBHOK                                                   | 3.312              | CAMWUM    | 3.308              | DITJOI    | 3.361              | HAWMID    | 3.175              |
| YIBHUQ                                                   | 3.306              | CAMWUM01  | 3.298              | DITRIK    | 3.276              | IHENIV    | 3.513              |
| YIBJAY                                                   | 3.310              | CAMWUM02  | 3.285              | DITROQ    | 3.289              | INOCUM    | 3.344              |
| YIBJEC                                                   | 3.309              | CAMXOH    | 3.296              | DITROQ01  | 3.207              | IZAYUG    | 3.317              |
| YIBJIG                                                   | 3.305              | CAMXUN    | 3.322              | DITRUW    | 3.279              | IZAZIV    | 3.325              |
| YIBJIG01                                                 | 3.303              | CAMYAU    | 3.306              | DITSAD    | 3.295              | JEKYUW    | 3.426              |
| YIBJIG02                                                 | 3.306              | CAMYEY    | 3.305              | DOYBEA    | 3.421              | JIZWAS    | 3.312              |
| YIBLAA                                                   | 3.311              | CELZIE    | 3.336              | EFAPUA    | 3.318              | JIZWAS01  | 3.310              |
| ZIPCEK                                                   | 3.329              | CELZOK    | 3.251              | EFAQAH    | 3.316              | JIZWAS02  | 3.313              |
| ZIPCIO                                                   | 3.294              | CELZUQ    | 3.31               | EFAQEL    | 3.316              | KALHAK    | 3.310              |
| ZIPCUA                                                   | 3.295              | CEMLIS    | 3.316              | EGELIM    | 3.317              | KALHOY    | 3.309              |
| ARURIR                                                   | 3.286              | CEMLOY    | 3.295              | EGELOS    | 3.317              | KALHUE    | 3.311              |
| ARUROX                                                   | 3.322              | DAWJAQ    | 3.08               | EGELUY    | 3.317              | KALJAM    | 3.309              |
| BUSPIP                                                   | 3.175              | DAWJUK    | 3.296              | EGELUY01  | 3.311              | KAPXAE    | 3.314              |
| KAPXEI                                                   | 3.285              | OTEBEW    | 3.29               | QOXQOM    | 3.317              | SABVUN    | 3.304              |
| KAPXIM                                                   | 3.337              | OTEBIA    | 3.296              | QOXQUS    | 3.282              | SABVUN01  | 3.3                |
| KENKOE                                                   | 3.176              | OTEBOG    | 3.265              | QOXRAZ    | 3.276              | SABVUN02  | 3.305              |

| CCDC code | Al-Al distance / Å |
|-----------|--------------------|-----------|--------------------|-----------|--------------------|-----------|--------------------|
| KUKWAR    | 3.376              | OTEBOG    | 3.276              | QOXRED    | 3.31               | SABWAU    | 3.288              |
| KUKWEV    | 3.4                | OTECEX    | 3.299              | QOXRIH    | 3.289              | SABWAU01  | 3.29               |
| KUKWIZ    | 3.398              | OTECIB    | 3.325              | QOXRON    | 3.304              | SEWPAL    | 3.33               |
| KUZPUT    | 3.29               | OTECOH    | 3.309              | QOXSAA    | 3.295              | TABLAN    | 3.434              |
| KUZQAA    | 3.256              | OTECUN    | 3.319              | QOXSII    | 3.293              | TEPJAB    | 3.167              |
| LIXPOA    | 3.346              | OTEDAU    | 3.305              | QOXSOO    | 3.304              | TEWZEE    | 3.306              |
| LORPOA    | 3.313              | OTEDAU    | 3.279              | QOXSUU    | 3.307              | TOXMUQ    | 3.381              |
| LUWBUD    | 3.38               | OTEDIC    | 3.284              | QOXTEF    | 3.306              | TOXNAX    | 3.382              |
| MILQIJ    | 3.308              | OTEDOJ    | 3.287              | QOXTOP    | 3.304              | TOXNEB    | 3.4                |
| MILQOP    | 3.321              | OTEDUO    | 3.295              | QOXTUV    | 3.281              | TOXNIF    | 3.373              |
| MUKHEI    | 3.328              | OTEFAM    | 3.332              | QOXVEH    | 3.307              | UGATAA    | 3.317              |
| MUZKAV    | 3.168              | OTEFEA    | 3.293              | QUCFOL    | 3.4                | UGATEE    | 3.311              |
| MUZKEZ    | 3.175              | OTEFIE    | 3.294              | QUCFUR    | 3.607              | VABHUF    | 3.39               |
| NEDTID    | 3.265              | OTIBUQ    | 3.291              | QUSKEX    | 3.334              | VABJAN    | 3.391              |
| NEDTOJ    | 3.28               | OVEJUX    | 3.402              | QUSLOI    | 3.313              | VABLAP    | 3.388              |
| NEWCAW    | 3.371              | OYEWEW    | 3.178              | QUSLUO    | 3.314              | VAQTOZ    | 3.295              |
| NIRPAI    | 3.371              | OYEWIA    | 3.301              | QUSMAV    | 3.32               | VAQTUF    | 3.499              |
| NIRPEM    | 3.344              | OZEMIS    | 3.355              | QUSMEZ    | 3.318              | WAYMEQ    | 3.306              |
| NIRPIQ    | 3.36               | OZEMOY    | 3.409              | QUSMEZ01  | 3.316              | WAYMIU    | 3.28               |
| NIRPOW    | 3.346              | OZEMUE    | 3.369              | QUSMID    | 3.305              | WAYMOA    | 3.336              |
| OGUJUY    | 3.325              | PARPII    | 3.274              | QUSMOJ    | 3.323              | WEVYEE    | 3.348              |
| OGUKAF    | 3.282              | PIBZOS    | 3.29               | RAWZIA    | 3.332              | WOJJOV    | 3.305              |
| OGUKEJ    | 3.313              | PIBZUY    | 3.294              | RAYYOI    | 3.307              | XERJOV    | 3.156              |
| OQOBUT    | 3.304              | PICBAH    | 3.301              | REZUY     | 3.3                | XERJOV01  | 3.244              |
| OQOCAA    | 3.316              | QONQAM    | 3.312              | RIXPOF    | 3.316              | XOCROY    | 3.372              |
| OTAZUG    | 3.306              | QONQEQ    | 3.327              | SABVOH    | 3.314              | XOWJEB    | 3.313              |
| OTEBAS    | 3.291              | QOXQEC    | 3.302              | SABVOH01  | 3.292              | XUPSAE    | 3.403              |
| XUXPEO    | 3.267              | ZESZEE    | 3.275              | JEHWUS    | 3.322              | WIRXOO    | 3.242              |
| YABROM    | 3.328              | ZOVHUQ    | 3.351              | JEHXAZ    | 3.309              | ZIPCEK01  | 3.308              |
| YEYDUE    | 3.387              | JEHWEC    | 3.33               | JEHXIH    | 3.289              | YUQDUL    | 3.276              |
| YEYDUE    | 3.258              | JEHWIG    | 3.305              | JEHXON    | 3.325              | JEHWOM    | 3.306              |
| JEHXUT    | 3.31               |           |                    |           |                    |           |                    |



| CCDC code                                                | Al-Al distance / Å | CCDC code | Al-Al distance / Å | CCDC code | Al-Al distance / Å | CCDC code | Al-Al distance / Å |
|----------------------------------------------------------|--------------------|-----------|--------------------|-----------|--------------------|-----------|--------------------|
| Bridging type M-(R-COO) <sub>1</sub> (X) <sub>2</sub> -M |                    |           |                    |           |                    |           |                    |
| ZIPCEK                                                   | 2.871              | FICBUS    | 2.878              | JEHXAZ    | 2.851              | QUSKIB    | 2.869              |
| BUSQIQ                                                   | 2.83               | FICCAZ    | 2.85               | JEHXIH    | 2.899              | QUSLOI    | 2.847              |
| DAWJAQ                                                   | 2.84               | JEHWUS    | 2.853              | JEHXON    | 2.862              | QUSLUO    | 2.85               |
| DAWJUK                                                   | 2.867              | DESLAS    | 2.893              | JEHXUT    | 2.843              | QUSMAV    | 2.855              |
| DESHAO                                                   | 2.835              | DESLAS    | 2.985              | KIKNOL    | 2.828              | QUSMEZ    | 2.849              |
| DESKUL                                                   | 2.868              | DESLEW    | 2.882              | KIKNUR    | 2.959              | QUSMEZ01  | 2.856              |
| DESHES                                                   | 2.873              | DESLEW    | 2.965              | KIKPED    | 2.831              | QUSMID    | 2.857              |
| DESHIW                                                   | 2.857              | DESLIA    | 2.867              | MIJMOL    | 2.82               | QUSMOJ    | 2.866              |
| DESHOC                                                   | 2.844              | IZAYEQ    | 2.863              | MIJMUR    | 2.816              | UTABOJ    | 2.886              |
| DESHUI                                                   | 2.854              | IZAYUG    | 2.844              | ZIPCEK01  | 2.874              | UTABUP    | 2.883              |
| DESJAQ                                                   | 2.873              | IZAZIV    | 2.833              | DESLIA    | 2.978              | UTACAW    | 2.882              |
| DESJEU                                                   | 2.868              | IZEBEX    | 2.85               | DESLOG    | 2.863              | UTACOK    | 2.874              |
| DESJIY                                                   | 2.867              | MUKHUY    | 2.86               | TEWZEE    | 2.862              | WAKHAU    | 2.798              |
| DESJOE                                                   | 2.858              | NEMQEE    | 2.792              | JEHWEC    | 2.867              | WAKHAU01  | 2.825              |
| DESJUK                                                   | 2.853              | NEMQII    | 2.785              | JEHWIG    | 2.84               | QUSKEX    | 2.86               |
| DESKOF                                                   | 2.893              | OTEBIA    | 2.866              | JEHWOM    | 2.862              | YABROM    | 2.846              |
| RUPNEW                                                   | 2.887              |           |                    |           |                    |           |                    |

**Table S4.** M-M distances of the Ga-based coordination materials reported in the Cambridge Crystallographic Data Centre (CCDC) database. Surveyed using ConQuest as of June 1<sup>st</sup>, 2024.

| CCDC code                                                | Ga-Ga distance / Å | CCDC code | Ga-Ga distance / Å | CCDC code | Ga-Ga distance / Å | CCDC code | Ga-Ga distance / Å |
|----------------------------------------------------------|--------------------|-----------|--------------------|-----------|--------------------|-----------|--------------------|
| Bridging type M-(R-COO) <sub>2</sub> (X) <sub>1</sub> -M |                    |           |                    |           |                    |           |                    |
| YUWBUO                                                   | 3.376              | QOVWU U01 | 3.371              | VIGMIL    | 3.358              | DUDGOB    | 3.328              |
| QOZYAG                                                   | 3.383              | VIGJII    | 3.364              | VIGMOR    | 3.33               | DUDGUH    | 3.335              |
| HIJKUK                                                   | 3.436              | VIGJOO    | 3.346              | VIGMUX    | 3.354              | OTAQAD    | 3.349              |
| HIJLAR                                                   | 3.431              | VIGJUU    | 3.360              | VIGNAE    | 3.357              | DUDGUH    | 3.335              |
| LOQLIN02                                                 | 3.355              | VIGKAB    | 3.360              | VIGSEN    | 3.371              | DUDGUH    | 3.335              |
| LOQLIN03                                                 | 3.352              | VIGKEF    | 3.359              | VIGSIR    | 3.376              | OVEKIM    | 3.419              |
| LOQLIN04                                                 | 3.352              | VIGKIJ    | 3.359              | AGEDIC    | 3.420              | OVEKOS    | 3.366              |
| LOQLIN05                                                 | 3.349              | VIGKOP    | 3.358              | ASAKUC    | 3.432              | OVEKUY    | 3.365              |
| LOQLIN06                                                 | 3.379              | VIGKUV    | 3.358              | COMDOY    | 3.367              | PARPUU    | 3.390              |
| LOQLIN07                                                 | 3.371              | VIGLAC    | 3.358              | DENLUG    | 3.308              | PEDWON    | 3.318              |
| LOQLIN08                                                 | 3.369              | VIGLEG    | 3.359              | DONNAW    | 3.361              | QAWBUN    | 3.385              |

| CCDC code                                                | Ga-Ga distance / Å | CCDC code | Ga-Ga distance / Å | CCDC code | Ga-Ga distance / Å | CCDC code | Ga-Ga distance / Å |
|----------------------------------------------------------|--------------------|-----------|--------------------|-----------|--------------------|-----------|--------------------|
| LOQLIN09                                                 | 3.371              | VIGLIK    | 3.360              | DONNAW01  | 3.374              | QOVWOO    | 3.341              |
| LOQLIN10                                                 | 3.370              | VIGLOQ    | 3.360              | DONNEA    | 3.363              | QOVWOO01  | 3.336              |
| LOQLIN11                                                 | 3.370              | VIGMAD    | 3.361              | DONNIE    | 3.364              | QOZYAG    | 3.382              |
| QOVWOO02                                                 | 3.336              | VIGMEH    | 3.357              | DOTTEM    | 3.372              | QUFCUS    | 3.233              |
| YATROD                                                   | 3.510              | YEDVIQ    | 3.350              |           |                    |           |                    |
| Bridging type M-(R-COO) <sub>1</sub> (X) <sub>2</sub> -M |                    |           |                    |           |                    |           |                    |
| CESGAJ                                                   | 2.962              | CESGEN    | 2.927              |           |                    |           |                    |
| Bridging type M-(X) <sub>2</sub> -M                      |                    |           |                    |           |                    |           |                    |
| ALAGEA01                                                 | 3.097              | QUDBIA    | 3.013              | TEVPAL    | 3.145              | VIQROE    | 3.080              |
| QIZHAJ                                                   | 3.081              | TEVNIR    | 3.042              | TEVPEP    | 3.055              | YELBEW    | 3.070              |
| PAFJOW                                                   | 3.037              |           |                    |           |                    |           |                    |

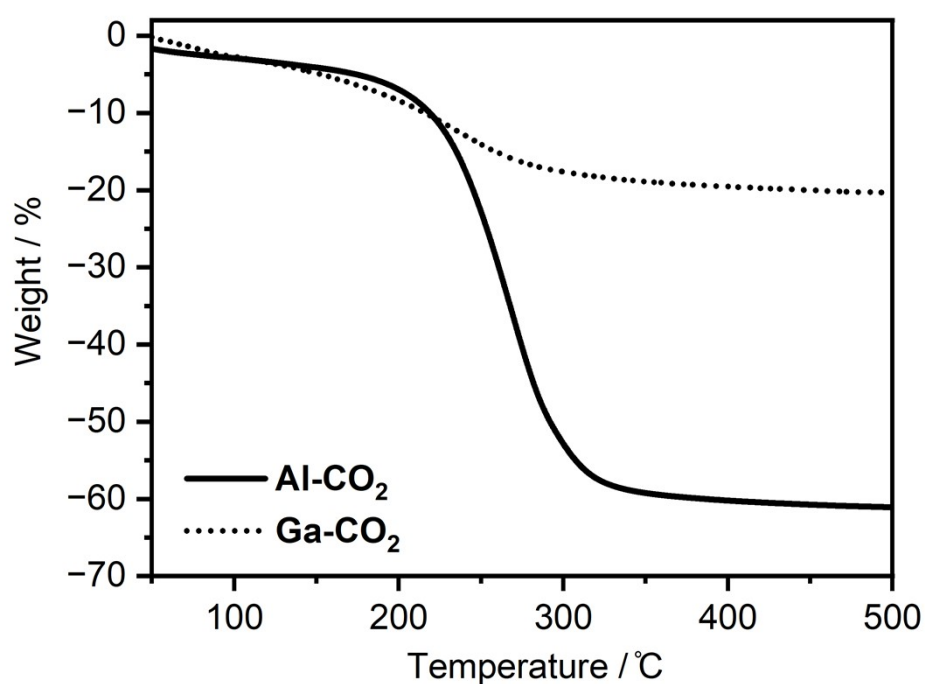

**Figure S24.** TGA curves of Al-CO<sub>2</sub> and Ga-CO<sub>2</sub> under N<sub>2</sub>.

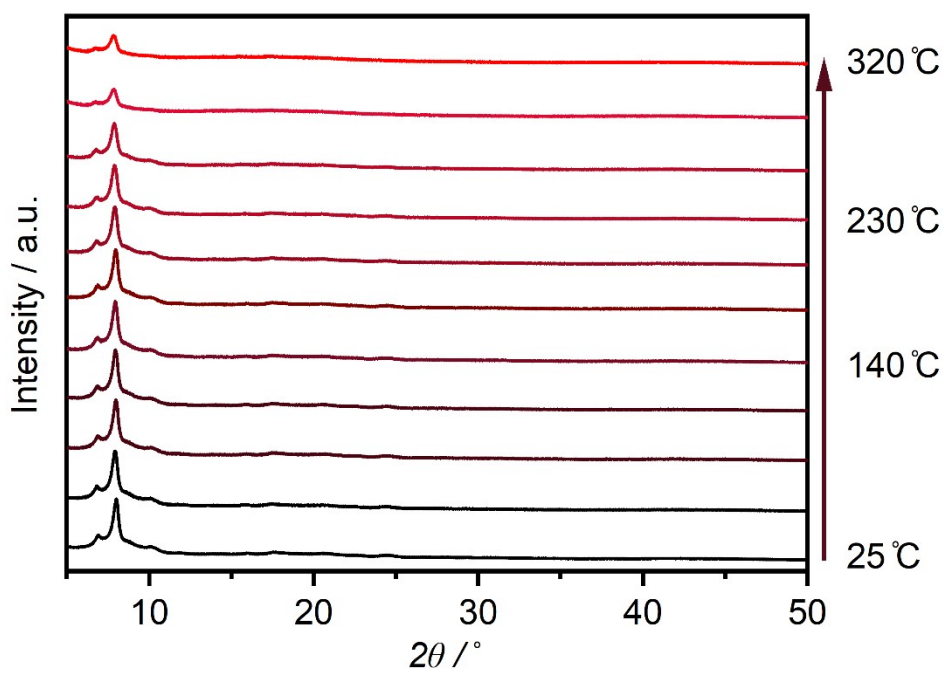

**Figure S25.** Variable-temperature synchrotron PXRD patterns of Al-CO<sub>2</sub>.

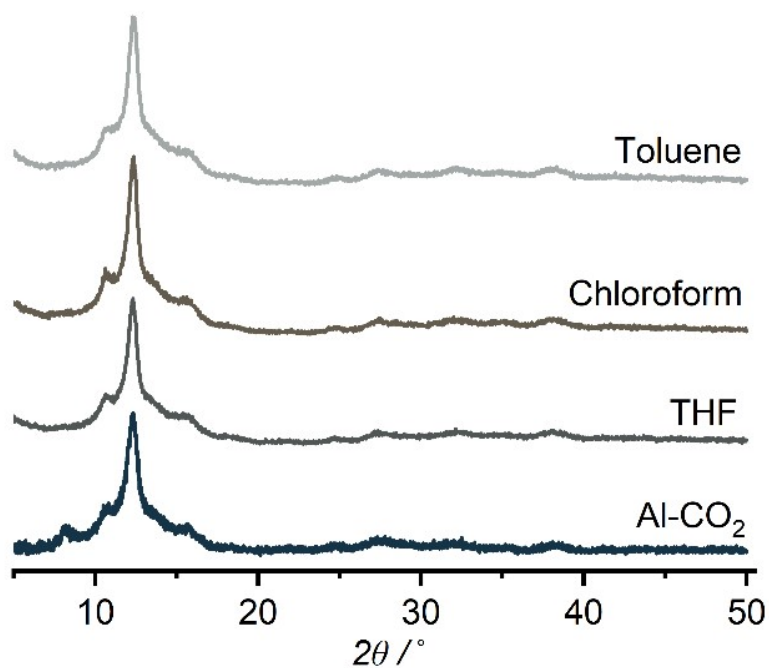

**Figure S26.** PXRD patterns of Al-CO<sub>2</sub> after soaking in solvent 24 hours; THF, chloroform, and toluene.

## CO<sub>2</sub> cycloaddition reaction; CO<sub>2</sub> conversion calculation

Conversion (%) calculated from the integral values (I) of proton in the starting reagents and products using CDCl<sub>3</sub> as a solvent.<sup>6, 7</sup>

$$\% \text{ Conversion} = (I_{\text{Hb}'} \times 100) / (I_{\text{Hb}} + I_{\text{Hb}'})$$

$I_{\text{Hb}}$  = Integral of <sup>1</sup>H<sub>b</sub> peak

$I_{\text{Hb}'}$  = Integral of <sup>1</sup>H<sub>b'</sub> peak

| Epoxide         | δH (CDCl <sub>3</sub> )(epoxide, <sup>1</sup> H <sub>b</sub> ) | δH (CDCl <sub>3</sub> )(epoxide, <sup>1</sup> H <sub>b'</sub> ) |
|-----------------|----------------------------------------------------------------|-----------------------------------------------------------------|
| Epichlorohydrin | 2.67                                                           | 4.40                                                            |
| Styrene oxide   | 2.78                                                           | 4.31                                                            |

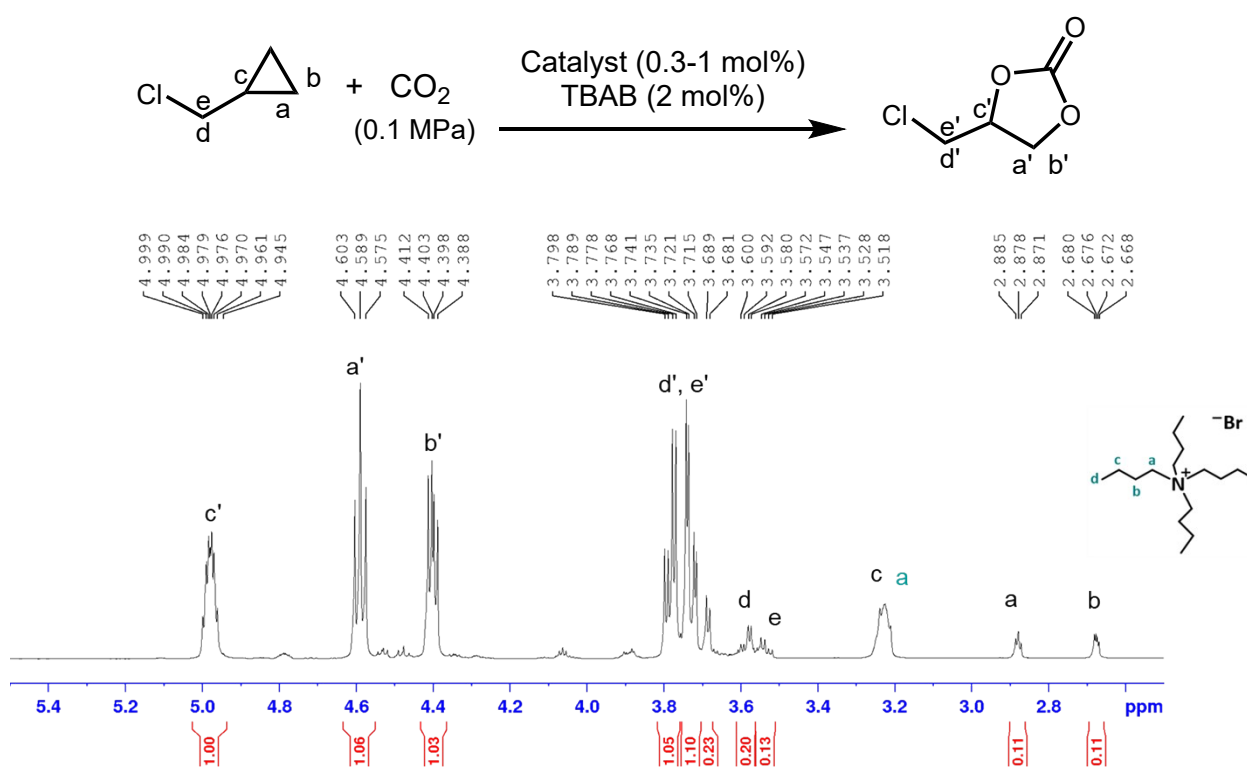

**Figure S27.** <sup>1</sup>H NMR (CDCl<sub>3</sub>) spectrum of cycloaddition of CO<sub>2</sub> to CPC by using 1 mol% of Al-CO<sub>2</sub> (0.1 MPa of CO<sub>2</sub>, 30 °C, 48 h).

**Table S5.** Catalytic performance and reaction conditions of literature and *M*-CO<sub>2</sub> for CO<sub>2</sub> cycloaddition with ECH at mild conditions.

| Catalyst                                        | CO <sub>2</sub> pressure | Temp / °C | Time / h | Catalyst / mol% | TBAB / mol% | Conversion / % | TON               | TOF / h <sup>-1</sup> | Ref.      |
|-------------------------------------------------|--------------------------|-----------|----------|-----------------|-------------|----------------|-------------------|-----------------------|-----------|
| Cu-MOF                                          | 0.1 MPa                  | 80        | 12       | 0.25            | 1.25        | 82             | 320               | 26.7                  | 8         |
| Cu <sub>2</sub> (O <sub>2</sub> C) <sub>4</sub> | 0.1 MPa                  | 70        | 16       | 0.40            | 0.20        | >99            | -                 | -                     | 7         |
|                                                 | 0.1 MPa                  | 70        | 24       | 0               | 0.31        | 43             | -                 | -                     | 9         |
| Zn-MOF                                          | 0.1 MPa                  | 70        | 24       | 0.45            | 0.31        | 98             | 217               | 9.0                   |           |
| Zn-MOF                                          | 0.1 MPa                  | 30        | 24       | 0.45            | 0.31        | 53             | 118               | 4.9                   |           |
| Zn-MOF                                          | 0.1 MPa                  | 40        | 24       | 0.44            | 1           | >99            | 225               | 9                     | 10        |
| Zn-URJC-8                                       | 1.2 MPa                  | 25        | 24       | 1.0             | 5           | 91             | -                 | -                     | 11        |
|                                                 | 0.1 MPa                  | 25        | 24       | 1.5             | 5           | 86             | -                 | -                     |           |
| Al-fumarate                                     | 1.0 MPa                  | 50        | 6        | 20 mg           | 2           | 96             | -                 | -                     | 12        |
| Ba-MOF                                          | 0.1 MPa                  | RT        | 48       | 0.5             | 2           | 90.2           | 180               | 3.8                   | 13        |
| TMOF (Cu-MOF)                                   | 0.1 MPa                  | RT        | 48       | 1               | 10          | 92             | -                 | -                     | 14        |
| Ni-MOF                                          | 0.1 MPa                  | 60        | 24       | 0.05            | 1           | 97             | 39                | 6.5                   | 15        |
| Co-MOF                                          | 0.1 MPa                  | RT        | 48       | 0.08            | 7.5         | 74.2           | 1020 <sup>a</sup> | 21.3 <sup>a</sup>     | 16        |
|                                                 | 0.1 MPa                  | 30        | 12       | 0               | 2           | 23.8           | -                 | -                     | This work |
|                                                 | 0.1 MPa                  | 30        | 24       | 0               | 2           | 39.5 ± 4.3     | -                 | -                     | This work |
|                                                 | 0.1 MPa                  | 30        | 48       | 0               | 2           | 67.5 ± 3.1     | -                 | -                     | This work |
|                                                 | 0.1 MPa                  | 30        | 72       | 0               | 2           | 88.8           | -                 | -                     | This work |
| Al-CO <sub>2</sub>                              | 0.1 MPa                  | 30        | 24       | 0.3             | 2           | 49.8           | 176               | 7.3                   | This work |
| Al-CO <sub>2</sub>                              | 0.1 MPa                  | 30        | 24       | 0.5             | 2           | 54.2 ± 4.3     | 108               | 4.5                   | This work |
| Al-CO <sub>2</sub>                              | 0.1 MPa                  | 30        | 48       | 0.5             | 2           | 81.5 ± 5.5     | 163               | 3.4                   | This work |
| Al-CO <sub>2</sub>                              | 0.1 MPa                  | 30        | 12       | 1.0             | 2           | 26.3           | 26                | 2.2                   | This work |
| Al-CO <sub>2</sub>                              | 0.1 MPa                  | 30        | 24       | 1.0             | 2           | 55.6 ± 6.0     | 56                | 2.3                   | This work |
| Al-CO <sub>2</sub>                              | 0.1 MPa                  | 30        | 48       | 1.0             | 2           | 94.4 ± 5.8     | 94                | 2.0                   | This work |
| Al-CO <sub>2</sub>                              | 0.1 MPa                  | 30        | 72       | 1.0             | 2           | 97.9           | 98                | 1.4                   | This work |
| Ga-CO <sub>2</sub>                              | 0.1 MPa                  | 30        | 24       | 0.5             | 2           | 55.8 ± 4.4     | 112               | 4.7                   | This work |
| Ga-CO <sub>2</sub>                              | 0.1 MPa                  | 30        | 48       | 0.5             | 2           | 81.8 ± 7.4     | 164               | 3.4                   | This work |
| Ga-CO <sub>2</sub>                              | 0.1 MPa                  | 30        | 12       | 1.0             | 2           | 32.2           | 32                | 2.7                   | This work |
| Ga-CO <sub>2</sub>                              | 0.1 MPa                  | 30        | 24       | 1.0             | 2           | 61.2 ± 3.9     | 61                | 2.6                   | This work |
| Ga-CO <sub>2</sub>                              | 0.1 MPa                  | 30        | 48       | 1.0             | 2           | 91.6 ± 0.1     | 92                | 1.9                   | This work |
| Ga-CO <sub>2</sub>                              | 0.1 MPa                  | 30        | 72       | 1.0             | 2           | 98.4           | 98                | 1.4                   | This work |

TON calculated by N (mmol of Product)/N (mmol of catalyst)

TOF = TON/reaction time (h)

<sup>a</sup>TON/TOF calculated using mmol of active site

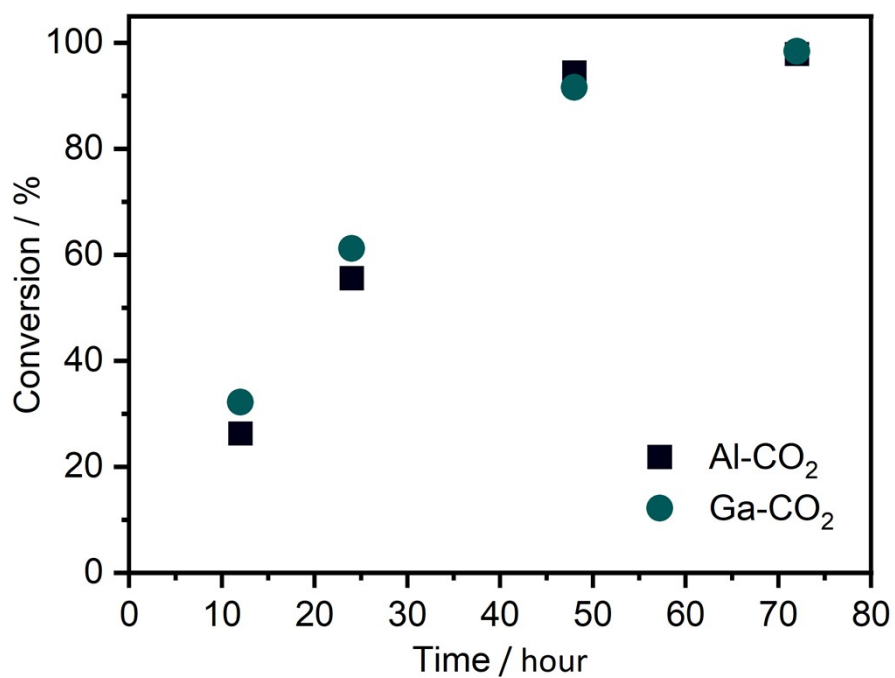

**Figure S28.** Time-course of conversion of ECH into CPC with the presence of *M*-CO<sub>2</sub> (1.0 mol%) and TBAB (2.0 mol%) at 30 °C under 0.1 MPa of CO<sub>2</sub>.

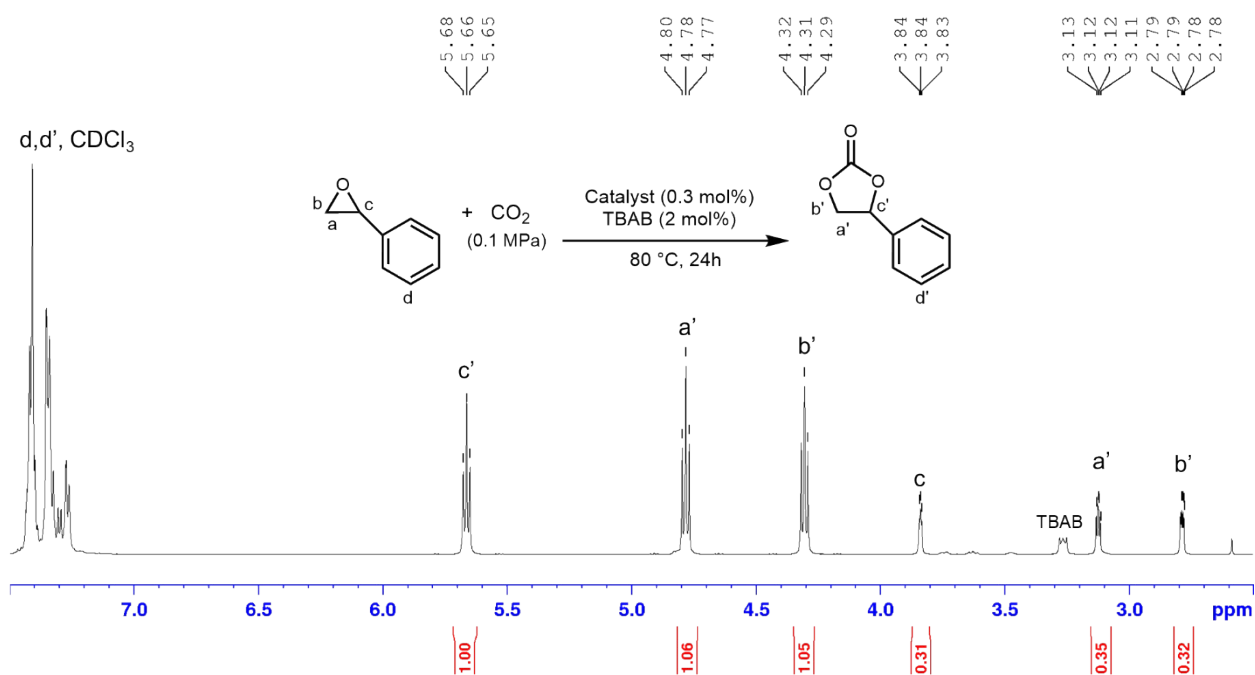

**Figure S29.** <sup>1</sup>H NMR (CDCl<sub>3</sub>) spectrum of cycloaddition of CO<sub>2</sub> to styrene carbonate by using 0.3 mol% of Al-CO<sub>2</sub> (0.1 MPa of CO<sub>2</sub>, 80 °C, 24 h).

**Table S6.** Catalytic performance and reaction conditions of literature and Al-CO<sub>2</sub> for CO<sub>2</sub> cycloaddition with styrene oxide at mild conditions.

| Catalyst           | CO <sub>2</sub> pressure | Temp / °C | Time / h | Catalyst / mol% | TBAB / mol% | Conversion / % | TON              | TOF / h <sup>-1</sup> | Ref.      |
|--------------------|--------------------------|-----------|----------|-----------------|-------------|----------------|------------------|-----------------------|-----------|
| Zn-MOF             | 0.1 MPa                  | 70        | 24       | 0.45            | 0.31        | 82             | 181              | 7.5                   | 9         |
| NUC-54(Cu)         | 0.1 MPa                  | 60        | 8        | 0.3             | 4           | 97             | 323              | 40                    | 17        |
| FCG-1a             | 0.1 MPa                  | 100       | 12       | 0.35            | 0.35        | 97             | 315              | 26.3                  | 18        |
| Cu-URJC-8          | 1.2 MPa                  | 30        | 24       | 1               | 4           | 47             | -                | -                     | 19        |
| Cu-MOF             | 0.1 MPa                  | 80        | 12       | 0.25            | 1.25        | 81             | 324              | 27                    | 8         |
| n-SU-101           | 0.1 MPa                  | 80        | 7        | 0.32            | 1           | 1.3            | -                | -                     | 20        |
| n-SU-101           | 0.3 MPa                  | 80        | 7        | 0.32            | 1           | 96.6           | 302              | 43.1                  |           |
| Co-MOF             | 0.1 MPa                  | RT        | 48       | 0.08            | 7.5         | 51.8           | 712 <sup>a</sup> | 14.8 <sup>a</sup>     | 16        |
|                    | 0.1 MPa                  | 70        | 12       | 0               | 2           | 37.9           | -                | -                     | This work |
| Al-CO <sub>2</sub> | 0.1 MPa                  | 70        | 12       | 0.3             | 2           | 49.8           | 175              | 14.6                  | This work |
| Al-CO <sub>2</sub> | 0.1 MPa                  | 80        | 12       | 0.3             | 2           | 52.4           | 185              | 15.4                  | This work |
| Al-CO <sub>2</sub> | 0.1 MPa                  | 80        | 24       | 0.3             | 2           | 76.3           | 269              | 11.2                  | This work |

TON calculated by N (mmol of Product)/N (mmol of catalyst)

TOF = TON/reaction time (h)

<sup>a</sup>TON/TOF calculated using mmol of active site

**Table S7.** Conversion and metal leaching on the supernatant after the reactions of recycling runs of ECH-CO<sub>2</sub> cycloaddition. (condition: catalyst 1 mol%, TBAB 2 mol%, T = 30 °C, t = 48 h and P = 0.1 MPa).

| Catalyst           | Cycle           | Conversion / % | Metal leaching / ppm by ICP-OES |
|--------------------|-----------------|----------------|---------------------------------|
| Al-CO <sub>2</sub> | 1 <sup>st</sup> | 94.4 ± 5.8     | 0.20 ± 0.15                     |
|                    | 2 <sup>nd</sup> | 91.1 ± 10.7    | 0.14 ± 0.15                     |
|                    | 3 <sup>rd</sup> | 93.9 ± 7.6     | 0.33 ± 0.18                     |
| Ga-CO <sub>2</sub> | 1 <sup>st</sup> | 91.6 ± 0.1     | 0.09 ± 0.02                     |
|                    | 2 <sup>nd</sup> | 89.2           | 0.07 ± 0.02                     |
|                    | 3 <sup>rd</sup> | 93.9 ± 0.8     | 0.07 ± 0.03                     |

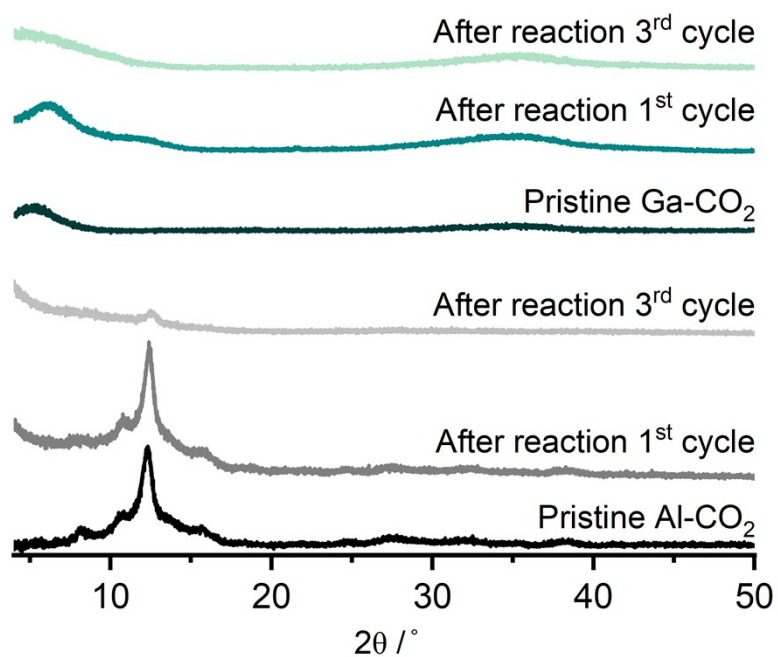

**Figure S30.** PXRD patterns of *M*-CO<sub>2</sub> and *M*-CO<sub>2</sub> after CO<sub>2</sub> cycloaddition with ECH.



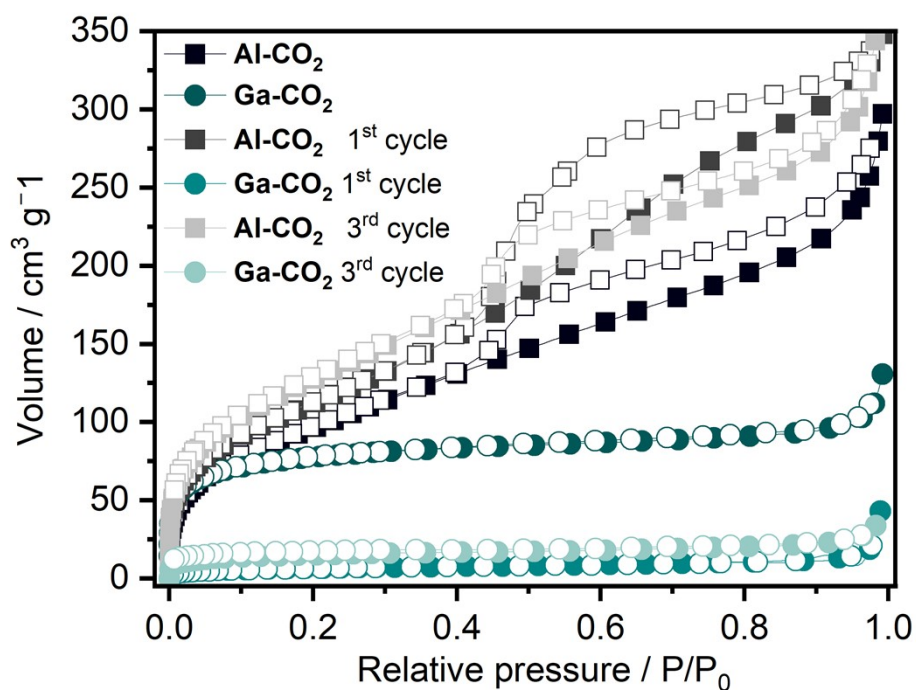

**Figure S31.**  $N_2$  adsorption isotherms of  $M-CO_2$  at 77 K before and after  $CO_2$  cycloaddition.

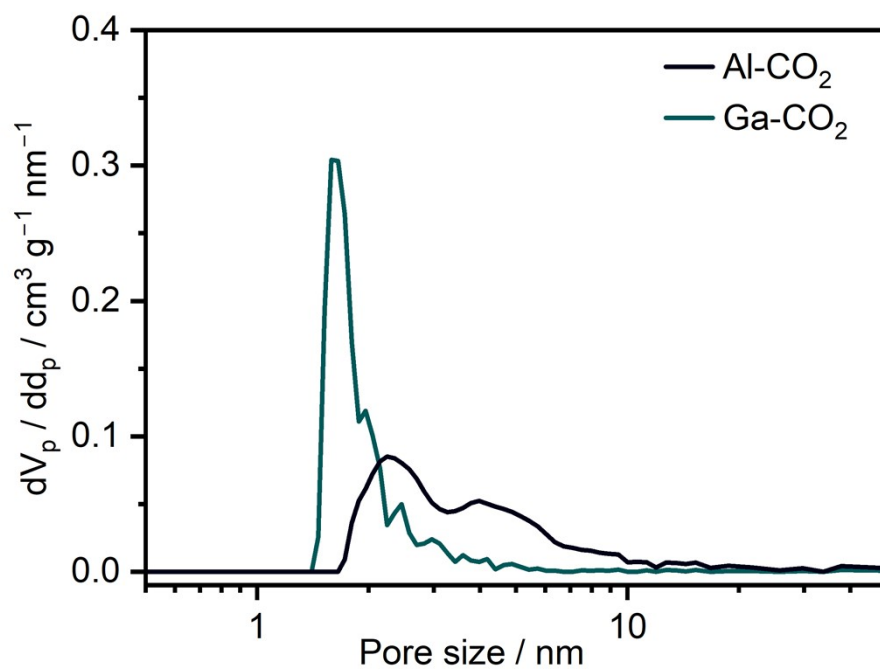

**Figure S32.** Pore size distribution of  $Al-CO_2$  and  $Ga-CO_2$ .

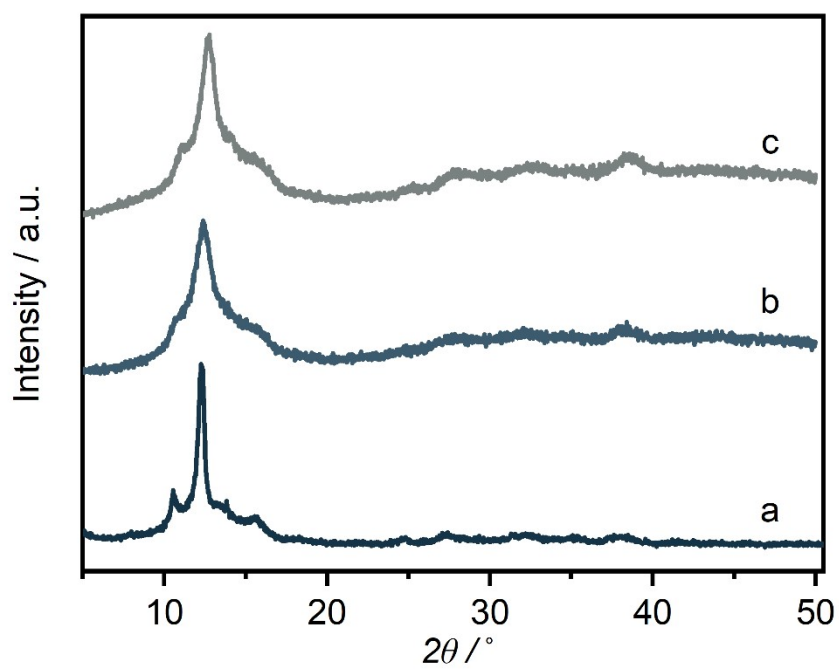

**Figure S33.** PXRD patterns of Al-CO<sub>2</sub> as (a) powder, (b) hand-grinded powder, and (c) monolith

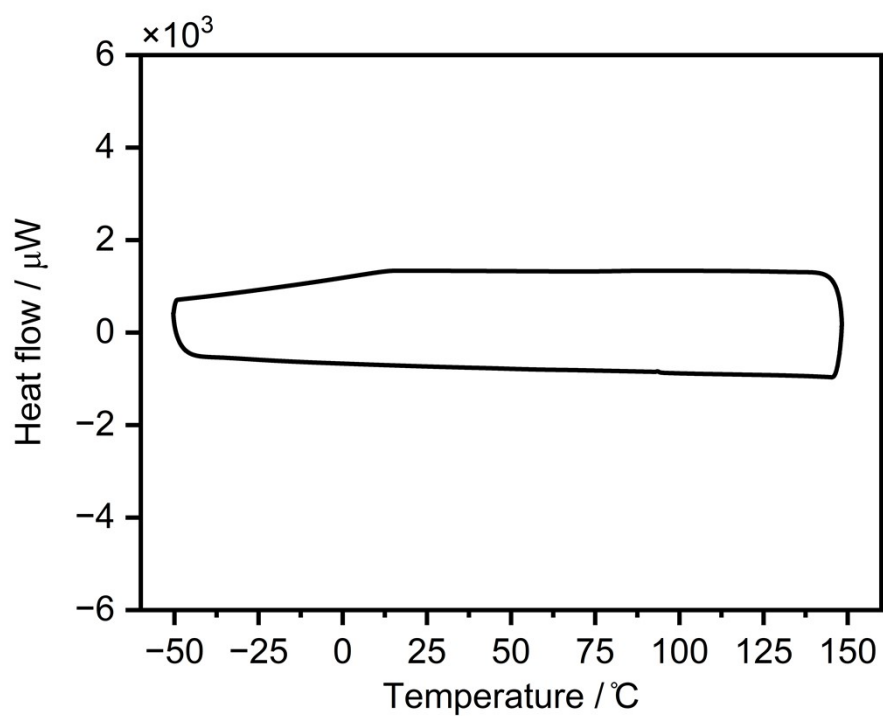

**Figure S34.** The 2<sup>nd</sup> cycle of DSC profile of ground Al-CO<sub>2</sub> powder.

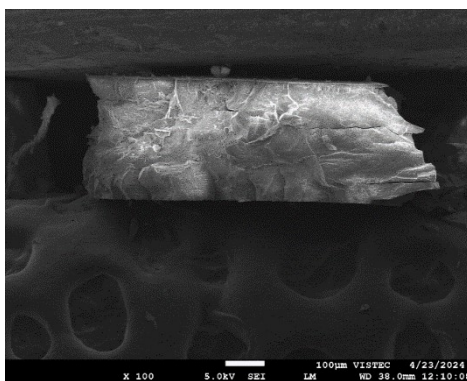

**Figure S35.** Cross-sectional SEM image of Al-CO<sub>2</sub> monolith.

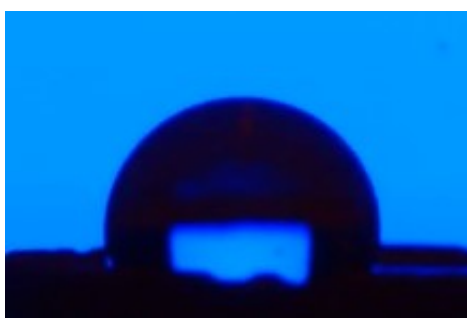

**Figure S36.** Photo of water droplet from contact angle measurement of Ga-CO<sub>2</sub> monolith.

**Table S8.** Gas adsorption properties of *M*-CO<sub>2</sub> before and after hot-pressing.

|                                                      |          | $S_{\text{BET}}$<br>(m <sup>2</sup> g <sup>-1</sup> ) | Volume<br>(cm <sup>3</sup> g <sup>-1</sup> ) | $d_p$ (nm) | Uptake at<br>P/P <sub>0</sub> of 1.0<br>(cm <sup>3</sup> g <sup>-1</sup> ) | Reduction of<br>gas uptake (%) |
|------------------------------------------------------|----------|-------------------------------------------------------|----------------------------------------------|------------|----------------------------------------------------------------------------|--------------------------------|
| <b>N<sub>2</sub> adsorption properties at 77 K</b>   |          |                                                       |                                              |            |                                                                            |                                |
| Al-CO <sub>2</sub>                                   | Powder   | 362.7                                                 | 0.49                                         | 2.4        | 297.1                                                                      | 94.2                           |
|                                                      | Monolith | 31.1                                                  | 0.03                                         | 2.6        | 17.2                                                                       |                                |
| Ga-CO <sub>2</sub>                                   | Powder   | 277.2                                                 | 0.24                                         | 1.6        | 130.7                                                                      | 85.4                           |
|                                                      | Monolith | 56.0                                                  | 0.04                                         | 1.8        | 19.14                                                                      |                                |
| <b>CO<sub>2</sub> adsorption properties at 195 K</b> |          |                                                       |                                              |            |                                                                            |                                |
| Al-CO <sub>2</sub>                                   | Powder   | 168.41                                                | 0.31                                         | 0.34       | 98.6                                                                       | 81.4                           |
|                                                      | Monolith | 48.0                                                  |                                              |            | 18.3                                                                       |                                |
| Ga-CO <sub>2</sub>                                   | Powder   | 221.4                                                 | 0.19                                         | 0.34       | 68.0                                                                       | 83.2                           |
|                                                      | Monolith | 40.7                                                  |                                              |            | 11.4                                                                       |                                |
| <b>H<sub>2</sub> adsorption properties at 77 K</b>   |          |                                                       |                                              |            |                                                                            |                                |
| Al-CO <sub>2</sub>                                   | Powder   |                                                       |                                              |            | 27.5                                                                       | 21.8                           |
|                                                      | Monolith |                                                       |                                              |            | 21.5                                                                       |                                |
| Ga-CO <sub>2</sub>                                   | Powder   |                                                       |                                              |            | 32.0                                                                       | 63.4                           |
|                                                      | Monolith |                                                       |                                              |            | 11.7                                                                       |                                |

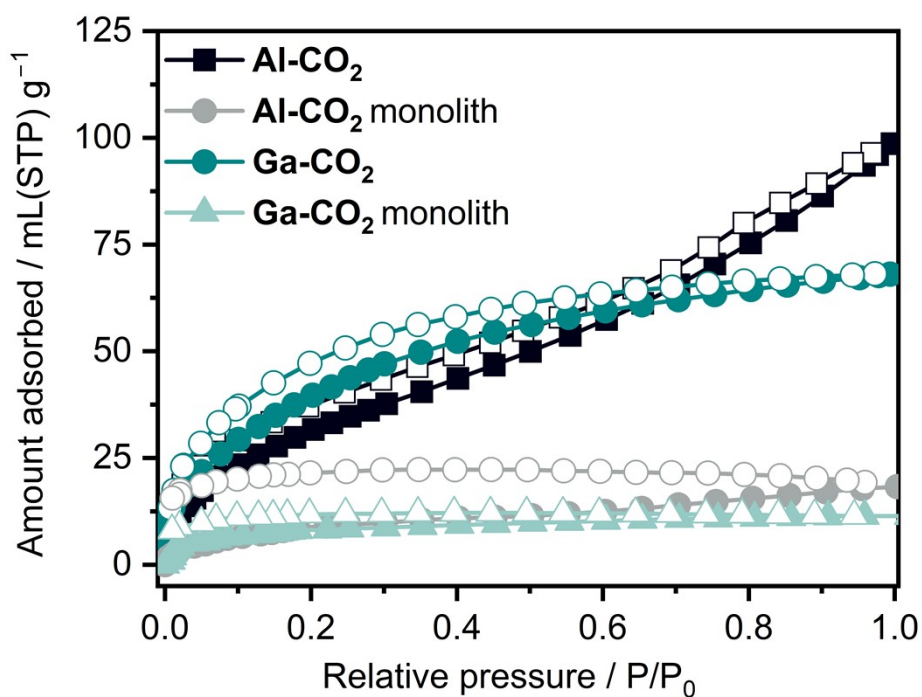

**Figure S37.** CO<sub>2</sub> adsorption isotherms of Al-CO<sub>2</sub> and Ga-CO<sub>2</sub> as powder and monoliths at 195 K.

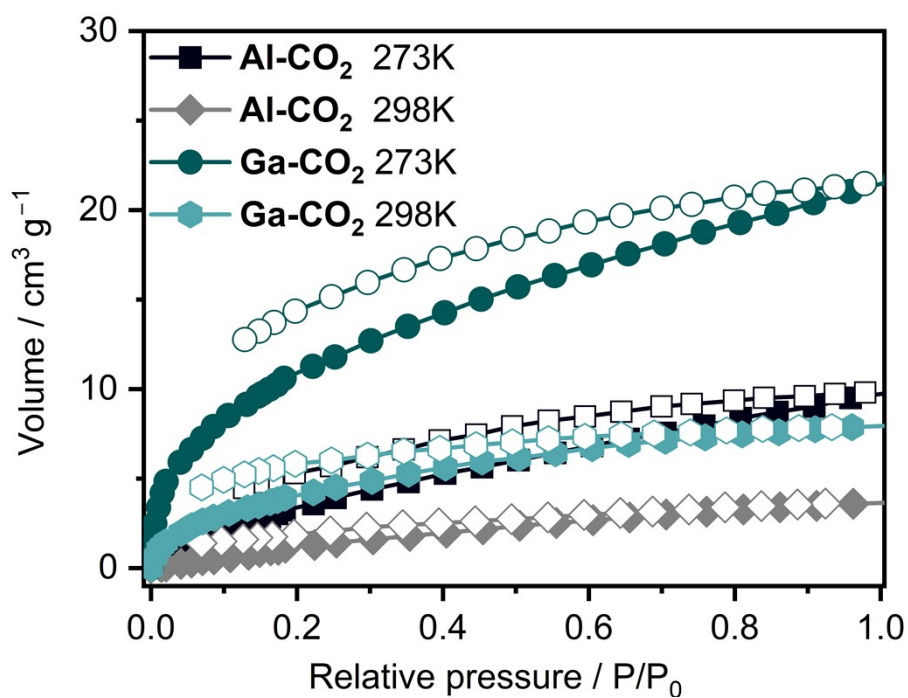

**Figure S38.** CO<sub>2</sub> adsorption isotherms of Al-CO<sub>2</sub> and Ga-CO<sub>2</sub> powder at 273 and 298 K.

## Reference

1. C. Hennig, A. Ikeda-Ohno, W. Kraus, S. Weiss, P. Pattison, H. Emerich, P. M. Abdala and A. C. Scheinost, *Inorg. Chem.*, 2013, **52**, 11734-11743.
2. A. S. Jbara, Z. Othaman, A. A. Ati and M. A. Saeed, *Mater. Chem. Phys.*, 2017, **188**, 24-29.
3. B. Cheng and E. T. Samulski, *J. Mater. Chem.*, 2001, **11**, 2901-2902.
4. V. N. Krasil'nikov, A. P. Tyutyunnik, I. V. Baklanova, A. N. Enyashin, I. F. Berger and V. G. Zubkov, *CrystEngComm*, 2018, **20**, 2741-2748.
5. Y.-Q. Tian, Y.-M. Zhao, H.-J. Xu and C.-Y. Chi, *Inorg. Chem.*, 2007, **46**, 1612-1616.
6. S. Kaewsai, S. Del Gobbo and V. D'Elia, *ChemCatChem*, 2024, **16**, e202301713.
7. A. K. Gupta, N. Guha, S. Krishnan, P. Mathur and D. K. Rai, *J. CO<sub>2</sub> Util.*, 2020, **39**, 101173.
8. X. Yu, J. Gu, X. Liu, Z. Chang and Y. Liu, *Inorg. Chem.*, 2023, **62**, 11518-11527.
9. A. Eskemech, H. Chand, A. Karmakar, V. Krishnan and R. R. Koner, *Inorg. Chem.*, 2024, **63**, 3757-3768.
10. Z. A. K. Khattak, N. Ahmad, H. A. Younus, H. Ullah, B. Yu, K. S. Munawar, M. Ashfaq, M. Yaseen, M. Danish, M. Al-Abri, R. AlHajri and F. Verpoort, *Catal. Sci. Technol.*, 2024, **14**, 1888-1901.
11. J. Tapiador, P. Leo, A. Rodríguez-Diéguez, D. Choquesillo-Lazarte, G. Calleja and G. Orcajo, *Catal. Today*, 2022, **390-391**, 230-236.
12. H. S. Kim, K. Yu, P. Puthiaraj and W.-S. Ahn, *Micropor. Mesopor. Mater.*, 2020, **306**, 110432.
13. X.-Y. Li, L.-N. Ma, Y. Liu, L. Hou, Y.-Y. Wang and Z. Zhu, *ACS Appl. Mater. Interfaces.*, 2018, **10**, 10965-10973.
14. G. Zhang, G. Wei, Z. Liu, S. R. J. Oliver and H. Fei, *Chem. Mater.*, 2016, **28**, 6276-6281.
15. J. Li, W.-J. Li, S.-C. Xu, B. Li, Y. Tang and Z.-F. Lin, *Inorg. Chem. Commun.*, 2019, **106**, 70-75.
16. X. Zhang, J. Wang, Y. Bian, H. Lv, B. Qiu, Y. Zhang, R. Qin, D. Zhu, S. Zhang, D. Li, S. Wang, W. Mai, Y. Li and T. Li, *J. CO<sub>2</sub> Util.*, 2022, **58**, 101924.
17. H. Chen, T. Zhang, S. Liu, H. Lv, L. Fan and X. Zhang, *Inorg. Chem.*, 2022, **61**, 11949-11958.
18. P. P. Mondal, S. Sarkar, M. Singh and S. Neogi, *ACS Sustain. Chem. Eng.*, 2024, **12**, 15432-15446.
19. J. Tapiador, P. Leo, F. Gándara, G. Calleja and G. Orcajo, *J. CO<sub>2</sub> Util.*, 2022, **64**, 102166.
20. J. L. Obeso, J. G. Flores, C. V. Flores, V. B. López-Cervantes, V. Martínez-Jiménez, J. A. de los Reyes, E. Lima, D. Solis-Ibarra, I. A. Ibarra, C. Leyva and R. A. Peralta, *Dalton Trans.*, 2023, **52**, 12490-12495.
